# Supplementary material for: Long-range impacts of biomass burning on PM 2.5 : a case study of the UK with a globally nested model
Source: Copernicus journal article supplement (doi:10.5194/egusphere-2025-5524), 2025-11-20
Supplement: Supplementary file [file review_notes_long_range_imapct_.pdf › review_notes_long_range_imapct_.pdf]

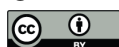

# Long-range impacts of biomass burning on PM<sub>2.5</sub>: a case study of the UK with a globally nested model

Damaris Y. T. Tan<sup>1,2</sup>, Mathew R. Heal<sup>2</sup>, David S. Stevenson<sup>3</sup>, Stefan Reis<sup>1,2</sup>, Massimo Vieno<sup>1</sup>, and Eiko Nemitz<sup>1</sup>

<sup>1</sup>UK Centre for Ecology & Hydrology, Bush Estate, Penicuik, Midlothian, EH26 0QB, UK

<sup>2</sup>School of Chemistry, University of Edinburgh, Joseph Black Building, David Brewster Road, Edinburgh, EH9 3FJ, UK

<sup>3</sup>School of GeoSciences, University of Edinburgh, Crew Building, Alexander Crum Brown Road, Edinburgh, EH9 3FF, UK

**Correspondence:** Damaris Y. T. Tan (damaris.tan@ed.ac.uk, damtan@ceh.ac.uk)

## Abstract.

Open biomass burning impacts air quality through direct emissions of fine particulate matter (PM<sub>2.5</sub>) and its role in secondary PM<sub>2.5</sub> formation. Here the interest is in the long distance and cumulative influences of biomass burning on annual mean concentrations of PM<sub>2.5</sub> in a country far removed from major biomass burning regions: the UK. A novel, globally nested setup of the EMEP4UK atmospheric chemistry transport model is used to isolate contributions to UK PM<sub>2.5</sub> from global biomass burning activity. Long-range influences are found to be considerable, with 0.99 µg m<sup>-3</sup> of UK-averaged PM<sub>2.5</sub> in 2019 being conditional on biomass burning emissions. Of this, 97% and 73% are associated with biomass burning outside the UK and outside the model's European domain, respectively – notably from Russia, Asia and boreal North America – which highlights the importance of boundary conditions on regional modelling setups. The simulations suggest some influences of biomass burning have lags of several weeks. The long-range component is enhanced by the role of biomass burning in secondary aerosol formation (58% of PM<sub>2.5</sub> conditional on biomass burning), of which 55% is organic; the inorganic component (mainly ammonium nitrate) derives from increased oxidation of local emissions, which may be mitigated through local emissions reductions. The PM<sub>2.5</sub> conditional on biomass burning is highly policy relevant for the UK, constituting (for 2019) 20% of the current WHO target and 10% of the contribution from all sources. This relative contribution is likely to increase as anthropogenic PM<sub>2.5</sub> declines and as climate change increases northern-hemispheric extratropical biomass burning.

## 1 Introduction

Open biomass burning (BB) impacts many fundamental aspects of the environment, including biodiversity, radiative forcing and air pollution (Keywood et al., 2013; Bowman et al., 2020; Jiang et al., 2016; Kelly et al., 2020; Lasslop et al., 2019; Voulgarakis and Field, 2015; Xu et al., 2024). Sources of BB include prescribed fires, agricultural fires and wildfires (UNEP, 2022). Whilst agricultural burning is a major concern in some areas, globally much attention is focused on wildfires, as anthropogenic changes in climate, population and land-use are increasing their frequency and intensity across the globe (UNEP, 2022; Cunningham et al., 2024; Seydi et al., 2025); for example, climatic factors are linked to increased wildfires, in the extratropics

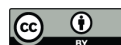

particularly (Jones et al., 2024b), while reductions in historic fire management practices are also linked to increased wildfire frequency and severity (Hessburg et al., 2021; Moura et al., 2019).

25 With respect to its impact on air quality, BB is a large source of particulate matter with an aerodynamic diameter of less than  $2.5 \mu\text{m}$  ( $\text{PM}_{2.5}$ ), both directly via primary  $\text{PM}_{2.5}$  emissions and indirectly via the formation of secondary  $\text{PM}_{2.5}$  (Lim et al., 2019; Ahern et al., 2019; Vakkari et al., 2014; He et al., 2024; Hodshire et al., 2019; Tan et al., 2025). Long-term exposure to  $\text{PM}_{2.5}$  is the air pollutant measure of greatest concern to human health due to its wide-ranging contributions to morbidity and premature mortality (Whaley et al., 2022; Garcia et al., 2023; Xu et al., 2024). In response to this, the World Health  
 30 Organization (WHO) has set a challenging annual mean air quality guideline for  $\text{PM}_{2.5}$  of  $5 \mu\text{g m}^{-3}$  (WHO, 2021).

The UK and Europe have relatively low incidence of BB compared to other world regions (Wiedinmyer et al., 2023), and this is mainly from wildfires because agricultural burning is largely prohibited (since 1993 in the UK (Ciais et al., 2010)) and prescribed burning is likewise tightly regulated (Harper et al., 2018). The contribution of BB to  $\text{PM}_{2.5}$  has therefore tended to be ignored in these locations whilst policy attention has focused on mitigation of anthropogenic sources of air pollutants. However,  
 35 as anthropogenic emissions contributing to  $\text{PM}_{2.5}$  in the UK, Europe and elsewhere continue to decline, other sources, such as those associated with BB, are becoming relatively more important. In addition, there is increasing recognition of the relevance of intercontinental-scale transport of wildfire plumes (Witham and Manning, 2007; Diapouli et al., 2014; Cottle et al., 2014; Vaughan et al., 2018; Zhang et al., 2025; Masoom et al., 2025). It is therefore timely to quantify the influence of BB locally and globally on countries such as the UK in more detail – particularly in the context of achieving the WHO air quality guideline.

40 BB enhances concentrations of  $\text{PM}_{2.5}$  at distance via the long-range transport and chemical reactions of its emissions. The aging of primary organic aerosols and the formation of secondary organic aerosols from BB emissions have been subject to many laboratory, field and modelling studies (Lim et al., 2019; Ahern et al., 2019; Vakkari et al., 2014; He et al., 2024; Hodshire et al., 2019). However, BB emissions can have more subtle indirect long-range impacts on secondary pollutants that only modelling studies can reveal. Tan et al. (2025) demonstrated the role of BB in the long-distance formation of ammonium  
 45 nitrate ( $\text{NH}_4\text{NO}_3$ ), a component of secondary inorganic aerosol (SIA). BB emissions of carbon monoxide (CO),  $\text{NO} + \text{NO}_2$  ( $\text{NO}_x$ ) and volatile organic compounds (VOCs) perturb the  $\text{OH} + \text{HO}_2$  ( $\text{HO}_x$ ) cycle at the global scale, leading to increased local-scale oxidation of  $\text{NO}_x$  and hence increased  $\text{NH}_4\text{NO}_3$  formation in regions with high local emissions of anthropogenic  $\text{NO}_x$  and ammonia ( $\text{NH}_3$ ). The phrasing ‘ $\text{PM}_{2.5}$  conditional on BB’, and its associated short-hand ‘ $\text{PM}_{2.5}(\text{BB})$ ’, is therefore used in this paper to refer to  $\text{PM}_{2.5}$  and its constituents that are consequent on BB. The terminology ‘conditional on’ emphasises  
 50 the fact that some of the mass making up these concentrations does not derive directly from BB emissions, but that this component of  $\text{PM}_{2.5}$  would not exist without the BB emissions.

The aim of this study, therefore, is to quantify the local and long-range, and direct and indirect, impacts of BB on annual mean  $\text{PM}_{2.5}$  in the UK, as an example of a country that is distant from areas of major BB. The focus is on the cumulative influences on the annual mean, as long-term exposure to  $\text{PM}_{2.5}$  has much greater public health burden than short-term exposures. Previous  
 55 work has considered the short-term impacts on UK air quality of individual wildfire events (Graham et al., 2020; Witham and Manning, 2007), but to the authors’ knowledge no studies quantify the long-term contributions of long-range transport of BB globally on UK  $\text{PM}_{2.5}$ . It is shown that a global nested model is needed to accurately account for long-range transport. The

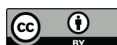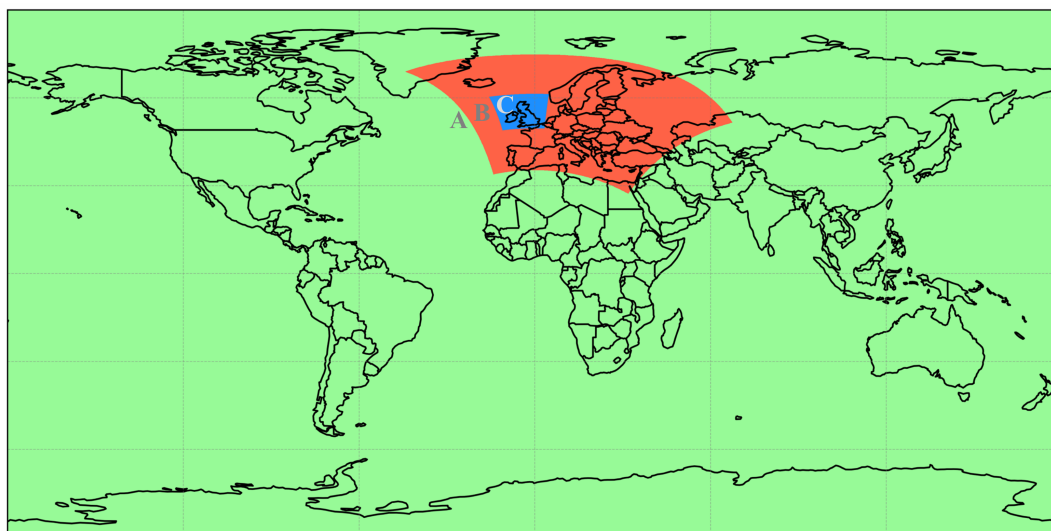

**Figure 1.** Domains of the globally nested configuration of the EMEP4UK model used here: (A) outer global domain, (B) intermediate European domain, and (C) inner domain covering the UK and ROI. Only domains B and C are used in the standard configuration of EMEP4UK.

results from the 2019 model year (chosen because of the relatively high BB activity in the UK that year (Perry et al., 2022)) are also set in the wider context of global BB emissions from 2012 to 2023. Although the UK is used as a case study, the methodology applied, and the qualitative insight generated, are general.

## 2 Methodology

### 2.1 Model setup

This work used a novel, globally nested setup of the EMEP4UK atmospheric chemistry transport model (ACTM), consisting of the three domains shown in Figure 1. In its standard setup (Vieno et al., 2016b), EMEP4UK operates over the two domains labelled B and C in the figure, with mostly prescribed boundary concentrations for domain B, and is a UK application of the European Monitoring and Evaluation Programme Meteorological Synthesizing Centre - West (EMEP MSC-W) Eulerian ACTM (Simpson et al., 2012). As the standard setup of EMEP4UK cannot accurately account for the transient influences of pollutant transport into domain B, the model was extended to full global coverage. The global domain (A) provides hourly boundary conditions for the intermediate European domain (B), which provides hourly boundary conditions for the inner domain (C) covering the UK and Republic of Ireland (ROI). Simulations were carried out with EMEP MSC-W model version 5.0.

Meteorology to drive the ACTM was calculated with the Weather Research and Forecast (WRF) model v4.2.2 (Skamarock et al., 2019) at spatial resolutions of  $1^\circ \times 1^\circ$ ,  $27 \text{ km} \times 27 \text{ km}$  and  $3 \text{ km} \times 3 \text{ km}$  for domains A-C respectively. There

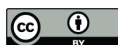

are 21 vertical layers extending up to 100 hPa. Reanalysis data from the US National Centre for Environmental Prediction (NCEP)/National Centre for Atmospheric Research (NCAR) Global Forecast System (GFS) and Newtonian nudging of wind vectors and temperature every 6 hours at  $1^\circ$  resolution (Saha et al., 2010) were used. WRF parameterisations are as described by Ge et al. (2021).

Model runs were conducted for the year 2019 and included a full year of spin-up (2018). Global domain simulations used anthropogenic emissions from the Task Force on Hemispheric Transport of Air Pollution (HTAP) v3 inventory for 2018 (Crippa et al., 2023; HTAP, 2024). The agricultural waste burning sector was not included to avoid the double counting of BB emissions. European domain simulations used 2019 anthropogenic emissions from the Centre for Emission Inventories and Projections (CEIP) (CEIP, 2021). In the innermost domain, simulations used 2019 anthropogenic emissions from the NAEI (2021) for the UK and MapEire from the Department of Environmental Science at Aarhus University with the Irish EPA (2021) for ROI. Emissions of isoprene and other biogenic VOCs from vegetation,  $\text{NO}_x$  from lightning and soils, marine dimethyl sulphide (DMS), and wind-derived dust and sea salt are linked to the meteorological year and simulated as reported in Simpson et al. (2012) and model update reports (Fagerli et al., 2024).

Gas-phase chemistry and inorganic aerosol thermodynamics are simulated with the EmChem19 chemical scheme (Bergström et al., 2022) and the Model for an Aerosol Reacting System (MARS) (Binkowski and Shankar, 1995), respectively. Secondary organic aerosol (SOA) formation, ageing and phase partitioning are parameterised using a 5-bin 1-D volatility basis set with effective saturation concentration  $C^*$  mid-points of 0.1, 1, 10, 100, 1000  $\mu\text{g m}^{-3}$  (Ots et al., 2016; Donahue et al., 2006; Bergström et al., 2012). Primary organic aerosol (POA) is treated as non-volatile and chemically inert, as is assumed by emissions inventories (Simpson et al., 2012). The model includes dry and wet removal processes as described by Simpson et al. (2012); Vieno et al. (2014); Ge et al. (2021).

Model output includes hourly gaseous and aerosol concentrations for all vertical model layers. The lowest model layer has a thickness of  $\sim 48$  m, and modelled air pollutant concentrations described here as surface concentrations have been adjusted to correspond to 3 m above the surface (Simpson et al., 2012).  $\text{PM}_{2.5}$  is calculated as the sum of the fine ( $< 2.5 \mu\text{m}$  diameter) fractions of sulfate ( $\text{SO}_4^{2-}$ ), nitrate ( $\text{NO}_3^-$ ), ammonium ( $\text{NH}_4^+$ ), organic matter (OM), sea salt, windblown dust, road dust, black carbon (BC), ash and a remaining primary component. A water component is not included to avoid ambiguity about how much water is associated with each  $\text{PM}_{2.5}$  constituent.

## 2.2 BB emissions

BB emissions for 2018 and 2019 were obtained from the Fire INventory from NCAR (FINN) v2.5 dataset, which uses fire detections from both Moderate Resolution Imaging Spectroradiometer (MODIS) and Visible Infrared Imaging Radiometer Suite (VIIRS) (Wiedinmyer et al., 2023; UCAR/NCAR/ACOM, 2023). The latter yields fire detection down to 375 m resolution. FINNv2.5 provides daily estimates of aerosol and trace gas emissions from BB globally at  $0.1^\circ \times 0.1^\circ$  resolution, calculated using burned area from active fire detections. In EMEP MSC-W rv5.0, BB emissions are regridded to model resolution and evenly distributed between the surface and the top of the boundary layer (Fagerli et al., 2023).





## 2.3 Sensitivity experiments

The following model experiments were carried out:

1. 'BASE': the base run with all emissions included.
- 110 2. 'NBB': No BB emissions globally.
3. 'NEBB': No European BB emissions anywhere in domain B in Figure 1, including in the UK.
4. 'NUBB': No UK BB emissions within domain C in Figure 1. Note that BB emissions in ROI were retained in this model run.
- 115 5. 'NRxBB': No Region x BB emissions, where x refers to the region numbers defined in Figure 2. For example, 'NR1BB' denotes the model run with no BB emissions in Region 1 of Figure 2. This set of simulations were carried out in the global domain only, and for 2019 only, because of the computational expense and to provide an estimate of the time taken for the spin-up of BB-derived species.

The regions 1 to 8 are based on those proposed for perturbation experiments under the 'HTAP3 Fires' model intercomparison project (Whaley et al., 2025), which were derived from the 14 Global Fire Emissions Database (GFED) regions frequently used  
 120 in fire emissions datasets (Giglio et al., 2013). These regions were chosen to allow comparison to experiments carried out under the 'HTAP3 Fires' project. Some minor changes were made to increase the relevance for the UK.

Concentrations conditional on BB emissions globally were calculated by subtracting the NBB run from the BASE run. Concentrations conditional on BB emissions in the UK and the European domain defined in Figure 1 were calculated by subtracting respectively the NUBB and NEBB model runs from the BASE model run. Concentrations conditional on BB  
 125 emissions in each Region x defined in Figure 2 were calculated by subtracting each NRxBB run from the BASE run. Population-weighted concentration means for the UK were calculated following the methodology described by Reis et al. (2018). Gridded 2021 UK population data were obtained from Carnell et al. (2025) (Figure A1 of Appendix A), which uses data from the 2022 (Scotland) and 2021 (rest of the UK) Censuses and a 2021 Land Cover Map.

## 2.4 Model evaluation

130 The EMEP4UK model in its standard configuration is regularly evaluated against measurements and is widely used for air quality studies (Lin et al., 2017; Ots et al., 2016; Vieno et al., 2016a; Purser et al., 2023; Nemitz et al., 2020; Liška et al., 2024; Macintyre et al., 2023a, b). To evaluate the globally nested configuration of the model, the BASE model run was repeated using the standard configuration of EMEP4UK, the setup of which is described in Vieno et al. (2010, 2014, 2016b) and Appendix B. The globally nested version of EMEP4UK is compared in Appendix B both to the standard configuration of EMEP4UK and  
 135 to UK supersite measurements, focussing on annual mean  $PM_{2.5}$  components. Secondary inorganic and total organic aerosol components of  $PM_{2.5}$  are generally very well represented in the globally nested version, particularly at sites most influenced

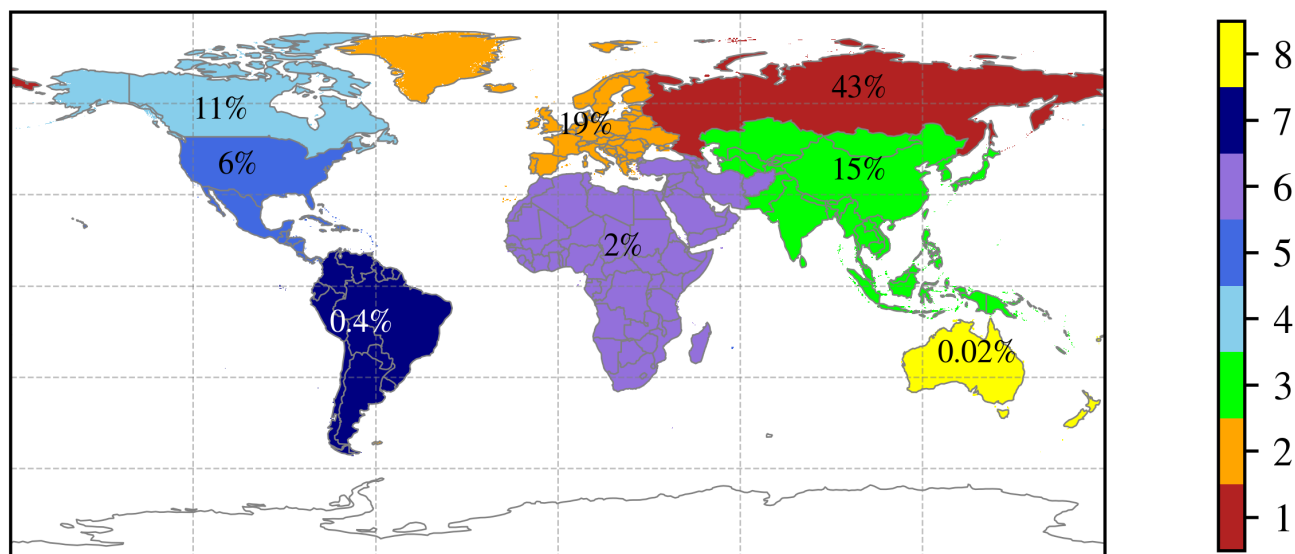

**Figure 2.** The eight source regions used for source-receptor experiments with the UK as the receptor region. The legend shows the assigned numbers. The percentage value superimposed on each source region is the relative contribution made by that region's BB emissions to the 2019 UK annual mean  $PM_{2.5}$  conditional on biomass burning. The percentages do not sum to 100% because of contributions from BB emissions in 2018 and non-linear interactions not captured by these 'brute force' model experiments.

by  $PM_{2.5}(BB)$ . The major instance of global model overestimation is sea salt, which is not relevant to this study and is linked to changes made in recent versions of the EMEP MSC-W model code where a larger percentage of the sea salt is attributed to the fine fraction to improve model performance for Continental Europe (Fagerli et al., 2021).

### 140 3 Results

The 2019 UK annual mean surface distribution of  $PM_{2.5}$  conditional on BB, referred to here as  $PM_{2.5}(BB)$ , is shown in Figure 3. Areas outside the UK are coloured grey in order to focus attention on the areas that contribute to calculations of data for the UK. Table 1 provides 2019 UK annual mean quantities related to  $PM_{2.5}(BB)$ .

Figure 4 provides 2019 UK daily mean time series of the quantities related to  $PM_{2.5}(BB)$ . Total  $PM_{2.5}$  (all sources) is plotted in Figure 4a (left y-axis), with the contribution of  $PM_{2.5}(BB)$  in blue and the remaining contribution in grey; the right y-axis (purple) shows the daily percentage contribution of  $PM_{2.5}(BB)$  to total  $PM_{2.5}$ . Table 1a shows that, on an annual-mean basis,  $PM_{2.5}(BB)$  contributes 10% to the 2019 UK area-weighted annual mean  $PM_{2.5}$ . This contribution will vary greatly geographically, with the relative contribution being lower at concentration hotspots and higher at background locations.

Figure 4b shows the UK area-weighted daily mean  $PM_{2.5}(BB)$  in 2019 (blue line), with the 25th to 75th percentile envelope (dark shading) and the 5th to 95th percentile envelope (light shading) of  $PM_{2.5}(BB)$  values across the model grid cells. The



**Table 1.** UK-wide 2019 annual means of the corresponding time series shown in Figure 4a-e. (a) Percentage contributions of  $\text{PM}_{2.5}$  conditional on biomass burning ( $\text{PM}_{2.5}(\text{BB})$ ) and from other sources to total UK area-weighted annual mean  $\text{PM}_{2.5}$ . (b) Area-weighted and population-weighted annual mean  $\text{PM}_{2.5}(\text{BB})$  concentrations, and the maximum and minimum individual model grid  $\text{PM}_{2.5}(\text{BB})$  concentrations. (c), (d), (e) Percentage contributions to the UK area-weighted annual mean  $\text{PM}_{2.5}(\text{BB})$  concentration split by (c) BB emissions in the UK, the European model domain and the global model domain (as defined in Figure 1), (d) primary vs secondary components, and (e) chemical composition. Annual means corresponding to Figure 4f are shown in Figure 2.

|                                         |                                                          |                                          |                         |
|-----------------------------------------|----------------------------------------------------------|------------------------------------------|-------------------------|
| (a)                                     | Contribution to total 2019 annual mean PM <sub>2.5</sub> | biomass burning                          | 10%                     |
|                                         |                                                          | other                                    | 90%                     |
| (b)                                     | UK 2019 annual PM <sub>2.5</sub> (BB)                    | max                                      | 1.3 µg m <sup>-3</sup>  |
|                                         |                                                          | min                                      | 0.66 µg m <sup>-3</sup> |
|                                         |                                                          | mean                                     | 0.99 µg m <sup>-3</sup> |
|                                         |                                                          | population-weighted mean                 | 1.1 µg m <sup>-3</sup>  |
| PM <sub>2.5</sub> (BB) contribution by: |                                                          |                                          |                         |
| (c)                                     | model domain                                             | C, excl. ROI                             | 3%                      |
|                                         |                                                          | B, excl. UK                              | 24%                     |
|                                         |                                                          | A, excl. domain B                        | 73%                     |
| -----                                   |                                                          |                                          |                         |
| (d)                                     | primary/secondary                                        | primary                                  | 42%                     |
|                                         |                                                          | secondary                                | 58%                     |
| -----                                   |                                                          |                                          |                         |
| (e)                                     | chemical composition                                     | primary organic matter (prim OM)         | 31%                     |
|                                         |                                                          | black carbon (BC)                        | 3%                      |
|                                         |                                                          | remaining primary (rem prim)             | 8%                      |
|                                         |                                                          | nitrate (NO <sub>3</sub> <sup>-</sup> )  | 17%                     |
|                                         |                                                          | ammonium (NH <sub>4</sub> <sup>+</sup> ) | 6%                      |
|                                         |                                                          | sulfate (SO <sub>4</sub> <sup>2-</sup> ) | 3%                      |
|                                         |                                                          | secondary organic matter (sec OM)        | 32%                     |

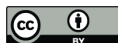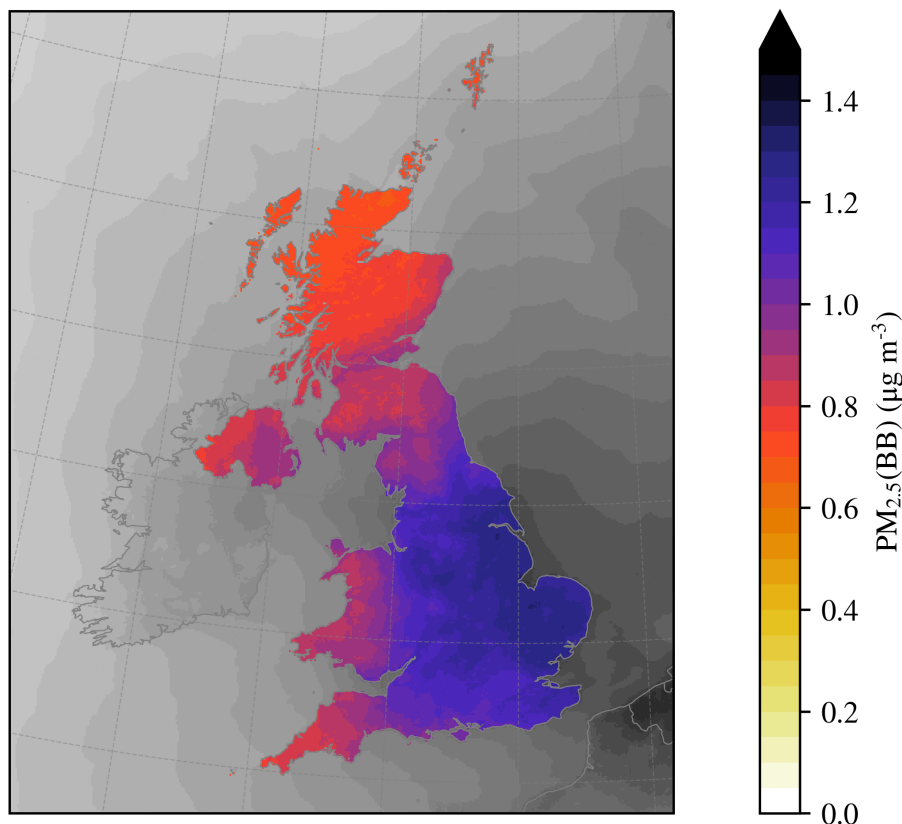

**Figure 3.** The 2019 UK annual mean  $PM_{2.5}$  conditional on BB ( $PM_{2.5}(BB)$ ). Values outside the UK are in coloured grey in order to focus attention on the areas that contribute to calculations of UK statistics. The bins used in the grey shading align with those in the colour legend enabling their values to be extrapolated from the latter.

maximum and minimum model grid cell annual mean  $PM_{2.5}(BB)$  concentrations are  $1.3$  and  $0.66 \mu g m^{-3}$ , respectively (Table 1b). Also plotted in Figure 4b (red line) are the UK population-weighted daily mean  $PM_{2.5}(BB)$  concentrations, calculated using 2021 UK population data (Carnell et al., 2025). The UK-wide area-weighted and population-weighted annual mean concentrations of  $PM_{2.5}(BB)$  are  $0.99$  and  $1.1 \mu g m^{-3}$ , respectively (Table 1b).

155 Figure 4c shows the percentage contribution to 2019 UK daily mean  $PM_{2.5}(BB)$  by BB emissions from the UK, the European domain (defined in Figure 1) and the global domain. The corresponding contributions of BB emissions to the 2019 UK annual mean  $PM_{2.5}(BB)$  are 3%, 24% and 73%, respectively (Table 1c).

Figure 4d apportions the chemical composition of the 2019 UK daily mean  $PM_{2.5}(BB)$  into primary and secondary components, with a more detailed chemical composition shown in Figure 4e. The annual mean values corresponding to the quantities  
 160 plotted in Figures 4d and e are provided in sections Table 1d and e respectively.



Figure 4f shows the percentage contributions to 2019 UK daily mean  $PM_{2.5}(BB)$  from BB emissions in the 8 source regions defined in Figure 2. The grey colour is the contribution to UK daily mean  $PM_{2.5}(BB)$  from BB emissions in 2018 (source-receptor experiments were only carried out for 2019). This illustrates that long-range impacts of BB on the UK have timescales of several weeks. A minor contribution to the grey colour also derives from non-linear interactions of BB-related species not captured by the ‘brute force’ model experiments. The annual contributions of the BB emissions from each source region to UK  $PM_{2.5}(BB)$  are shown in Figure 2. The percentages on this figure do not sum to 100% for the two aforementioned reasons in relation to the grey colour in Figure 4f.

## 4 Discussion

Annual mean surface concentrations of  $PM_{2.5}$  conditional on biomass burning ( $PM_{2.5}(BB)$ ) are considered here because annual mean surface  $PM_{2.5}$  is the metric of air pollution associated with the greatest human health burden, and is consequently subject to air quality guidelines and standards.

### 4.1 The need for global-scale modelling

Data in Table 1c reveal that a majority (73%) of the 2019 UK annual mean  $PM_{2.5}(BB)$  derives from BB emissions outside the EMEP4UK model’s European domain. This clearly demonstrates that continental scale modelling is insufficient to capture the full contribution of BB and that a global nesting approach is needed to provide realistic and spatially and temporally resolved boundary conditions to regional ACTMs in order to accurately capture the very long-range impacts of BB emissions. These long-range contributions from episodic emissions, such as from BB, would not be accurately captured through the prescribed boundary conditions of the standard configuration of EMEP4UK.

### 4.2 Biomass burning contributions to UK $PM_{2.5}$

In 2019, the annual mean  $PM_{2.5}(BB)$  associated with all BB emissions globally is  $0.99 \mu g m^{-3}$  (averaged over the UK), which is a significant proportion (10%) of total annual mean UK  $PM_{2.5}$  from all sources (Table 1). ~~To the authors’ knowledge, no other studies quantify the long-term contributions of the long-range transport of BB globally on UK  $PM_{2.5}$ , to allow comparison here.~~ The equivalent population-weighted  $PM_{2.5}(BB)$  value associated with all BB emissions globally is  $1.1 \mu g m^{-3}$ , or 22% of the WHO  $PM_{2.5}$  annual mean guideline concentration (WHO, 2021). Averaged over the UK and the full year, the  $PM_{2.5}(BB)$  comprises of more secondary aerosol than primary aerosol (58% and 42%, respectively) (Table 1d). The dominant primary component is primary OM, constituting ~~31/42 =~~ 74% of the primary  $PM_{2.5}(BB)$ . BC from BB emissions comprises just 3% of  $PM_{2.5}(BB)$  (7% of the primary  $PM_{2.5}(BB)$ ). Within the secondary component of UK annual mean  $PM_{2.5}(BB)$ , 55% is SOA and 45% is SIA, the latter dominated by  $NH_4NO_3$  (Table 1e). The enhanced  $NH_4NO_3$  formation is a subtle but important indirect consequence of BB emissions: the BB emissions change global oxidant concentrations which react with the large anthropogenic emissions of  $NO_x$  and  $NH_3$  in the UK (and elsewhere) (Tan et al., 2025). The extent to which this component is reproduced by a standard regional implementation of a model such as the EMEP MSC-W model depends on the concentrations

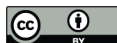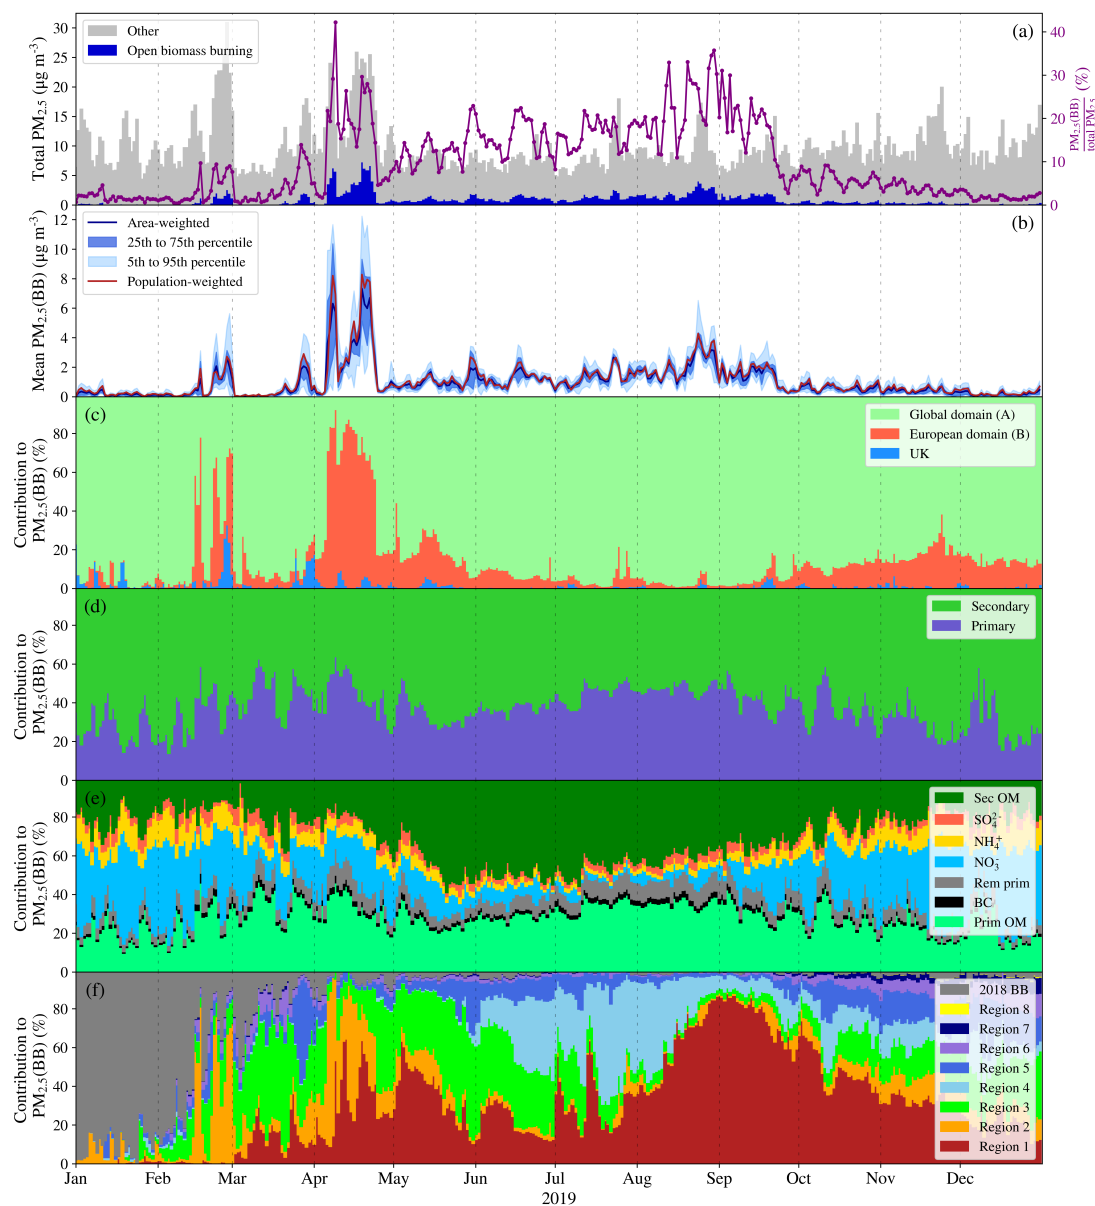

**Figure 4.** Time series of daily mean values (for 2019) of quantities related to UK-average  $PM_{2.5}(BB)$ , i.e. to  $PM_{2.5}$  conditional on biomass burning emissions. (a) Left y-axis: daily mean **total**  $PM_{2.5}$ , with the contribution of  $PM_{2.5}(BB)$  in blue, and all other contributions in grey; right y-axis (purple): percentage contribution of  $PM_{2.5}(BB)$  to **total**  $PM_{2.5}$ . (b) Daily mean area-weighted (blue) and population-weighted (red)  $PM_{2.5}(BB)$ , with shading showing the area-weighted 25th to 75th and 5th to 95th percentiles of  $PM_{2.5}(BB)$  values. (c)-(f) The percentage contributions to daily mean  $PM_{2.5}(BB)$ , split by (c) BB emissions from the UK, the European domain (Figure 1) and globally, (d) primary and secondary components, (e) chemical composition (legend abbreviations defined in Table 1), and (f) BB emissions in the source regions 1-8 defined in Figure 2. The grey area in (f) represents contributions from BB emissions in 2018 and a minor contribution from non-linear interactions between model experiments. The absolute  $PM_{2.5}(BB)$  concentrations shown in (b) should be noted when considering the relative contributions to  $PM_{2.5}(BB)$  in (c)-(f) to avoid over-interpretation of contributions to negligible absolute values.



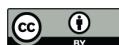

of oxidant drivers, such as CO, used as boundary concentrations. The standard setup of the EMEP4UK model uses prescribed boundary concentrations for CO (with a latitudinal gradient); **these long-range chemical influences are another reason why a global version of the model is required.** Other models such as GEOS-Chem (The International GEOS-Chem User Community, 2025; Marvin et al., 2024) and CHIMERE (Menut et al., 2013; Mazzeo et al., 2022) often pick up their boundary concentrations from global model outputs and if these include BB emissions should take account of this contribution. In contrast to  $\text{NH}_4\text{NO}_3$ , the model output indicates that the UK SOA conditional on BB is formed through the oxidation of pyrogenic VOC emissions, rather than oxidation of locally emitted VOCs via the mechanism underpinning the BB-induced  $\text{NH}_4\text{NO}_3$  formation.

The above discussion is based on UK averages for the whole year. The  $\text{PM}_{2.5}(\text{BB})$  concentrations vary spatially across the UK (Figure 3) and temporally during the year (Figure 4). Largest values of  $\text{PM}_{2.5}(\text{BB})$  occur in the southeast (maximum model gridcell value  $1.3 \mu\text{g m}^{-3}$ ), and lowest values in the northwest (minimum gridcell value of  $0.66 \mu\text{g m}^{-3}$ ). Meteorology plays a major role in explaining this southeast-northwest gradient, with the majority of contributions to  $\text{PM}_{2.5}(\text{BB})$  arising from BB emissions in Regions 1, 2 and 3 to the east of the UK (Figure 2). South, east and central England also have large anthropogenic emissions of  $\text{NO}_x$  and  $\text{NH}_3$ , as do other densely populated areas of the UK such as central Scotland (see Figures A1 and A2 in Appendix A). As a result, SIA formation conditional on BB is particularly enhanced in these areas (Tan et al., 2025), which contributes to the southeast-northwest gradient and to the superposition of spatial patterns of UK anthropogenic emissions on this gradient.

The greater population-weighted 2019 annual UK mean  $\text{PM}_{2.5}(\text{BB})$  of  $1.1 \mu\text{g m}^{-3}$  compared with the area-weighted mean  $\text{PM}_{2.5}(\text{BB})$  of  $0.99 \mu\text{g m}^{-3}$  shows that larger absolute  $\text{PM}_{2.5}(\text{BB})$  exposures coincide with more densely populated areas of the UK (see Figure A1 in Appendix A). This is a consequence of both meteorology and higher anthropogenic emissions of  $\text{NH}_3$  and particularly  $\text{NO}_x$  in highly populated regions, resulting in enhanced  $\text{NH}_4\text{NO}_3$  formation conditional on BB in the higher populated regions (Tan et al., 2025).

With respect to the temporal variabilities in BB contributions to UK  $\text{PM}_{2.5}$ , Figure 4 shows that the colder months of October to March are generally characterised by low concentrations of  $\text{PM}_{2.5}(\text{BB})$  (daily mean values less than  $1 \mu\text{g m}^{-3}$ ). For the year of study here – 2019 – this period of low  $\text{PM}_{2.5}(\text{BB})$  concentrations is interspersed with episodes of higher concentrations in February, March and April, which can be attributed to sources closer to the UK. **Highest  $\text{PM}_{2.5}(\text{BB})$  concentrations occur during a prolonged episode in April when daily mean  $\text{PM}_{2.5}(\text{BB})$  exceeds  $5 \mu\text{g m}^{-3}$  for 6 days and contributes between 13% and 42% of daily mean  $\text{PM}_{2.5}$  from all sources. The  $\text{PM}_{2.5}(\text{BB})$  contribution is superimposed on an already elevated episode of  $\text{PM}_{2.5}$  pollution derived from other sources.** The majority of this  $\text{PM}_{2.5}(\text{BB})$  is attributed to BB in the model's European domain (predominantly from eastern Europe and the western areas of Russia also included in that domain). Similar episodic peaks in  $\text{PM}_{2.5}(\text{BB})$  occur at the end of February and March 2019, with values exceeding  $1 \mu\text{g m}^{-3}$  on 13 days, and  $2 \mu\text{g m}^{-3}$  on 5 days. Notably, there is a larger contribution from BB in the UK here, as revealed in Figure 4c, as well as contributions from southern Europe in the February episode. This is consistent with Copernicus Atmosphere Monitoring Service (CAMS) reports of notable BB activity in the UK, northern Spain, southern France, Portugal and southeastern Europe in February 2019 (Copernicus, 2019).



Although there are no large variations in the proportions of primary and secondary  $\text{PM}_{2.5}(\text{BB})$  during the year (Figure 4d), there is a notable trend for the secondary component to consist more of SIA in winter and more of SOA in summer (Figure 4e); the lower temperatures in winter shift the  $\text{NH}_4\text{NO}_3$  equilibrium to the particle phase (Stelson and Seinfeld, 1982). Figure 4 also shows a tendency for the lowest concentrations of  $\text{PM}_{2.5}(\text{BB})$  to be dominated by secondary aerosol. This is because  $\text{PM}_{2.5}(\text{BB})$  concentrations are lowest when the associated BB sources are further removed from the UK receptor region, but the longer transport distances provide time for secondary chemical transformations.

The warmer months of May to September are characterised by a continuous period of moderately elevated  $\text{PM}_{2.5}(\text{BB})$ , with daily mean values ranging between  $0.4$  and  $4.1 \mu\text{g m}^{-3}$ . The mean ( $\pm 1$  standard deviation) daily value over this period is  $1.4 \pm 0.7 \mu\text{g m}^{-3}$ . This occurs at a time of lower total  $\text{PM}_{2.5}$  concentrations (all sources), resulting in a contribution of  $\text{PM}_{2.5}(\text{BB})$

ranging between 6 and 36%. In this period, the contribution from SIA is lower due to the increased  $\text{NH}_4\text{NO}_3$  dissociation constant at warmer temperatures (Stelson and Seinfeld, 1982). There is a higher contribution of SOA relative to the primary component due to increased oxidation and emission of VOCs at higher temperatures and greater sunlight. The majority of this  $\text{PM}_{2.5}(\text{BB})$  is attributed to BB outside the model's European domain, with larger contributions from Regions 1 (2019 Siberian wildfires (Bondur et al., 2020; Cho et al., 2025)), 3 and 4 of Figure 2.

The extended period of elevated  $\text{PM}_{2.5}(\text{BB})$  during the warmer months dominates the annual mean values in Table 1. The largest contributions to  $\text{PM}_{2.5}(\text{BB})$  are ascribed to BB in Regions 1 (Russia), 2 (Europe), 3 (Asia excluding Russia) and 4 (boreal North America), with respective contributions of 43%, 19%, 15% and 11% (Figure 2). Only 3% is attributed to BB within the UK. Southern hemispheric BB makes negligible contribution to UK  $\text{PM}_{2.5}(\text{BB})$  ( $< 2\%$ ). Approximately 5% of  $\text{PM}_{2.5}(\text{BB})$  is attributed to BB in the previous year (2018), for which the NRxBB experiments were not performed due to the computational expense involved. However, whilst its geographic origin has not been identified, it provides useful information about the spin-up time of BB-related species, which Figure 4f shows is approximately 3 months. Although only global model runs were used for the NRxBB experiments – and therefore the exact percentages shown in Figure 2 would likely differ slightly if these had been followed by additional European and UK nesting – these experiments nevertheless provide a good indication of the relative contribution of BB emissions in Regions 1-8 to UK  $\text{PM}_{2.5}(\text{BB})$  values.

### 4.3 Biomass burning contributions in 2019 compared to other years

Figure 5a compares the annual total global BB emissions of  $\text{PM}_{2.5}$  for 2019, split by Regions 1–8 (Figure 2), with the emissions from all other years from 2012 to 2023 according to the FINNv2.5 dataset. The spatial distribution of BB emissions for 2019 is shown in Figure C1 in Appendix C. Although 2019 has the highest global emissions in the 2012-2023 period, this is driven by anomalously high emissions in the southern hemisphere (especially Region 8 of Figure 2 – the Australian “Black Summer” of 2019-2020 (Davey and Sarre, 2020; Zhang et al., 2020)), which our modelling shows do not impact the UK.

Figure 5b provides an estimate of how much  $\text{PM}_{2.5}$  in the UK would likewise have been conditional on BB emissions from each Region 1-8 in each of the other years from 2012 to 2023, based on the assumption that the source-receptor relationships calculated for 2019 are applicable also to the other years. Annual BB emissions of  $\text{PM}_{2.5}$  from each region were weighted according to the impact of the 2019 BB emissions from that region on UK  $\text{PM}_{2.5}(\text{BB})$  in 2019, using the following method.

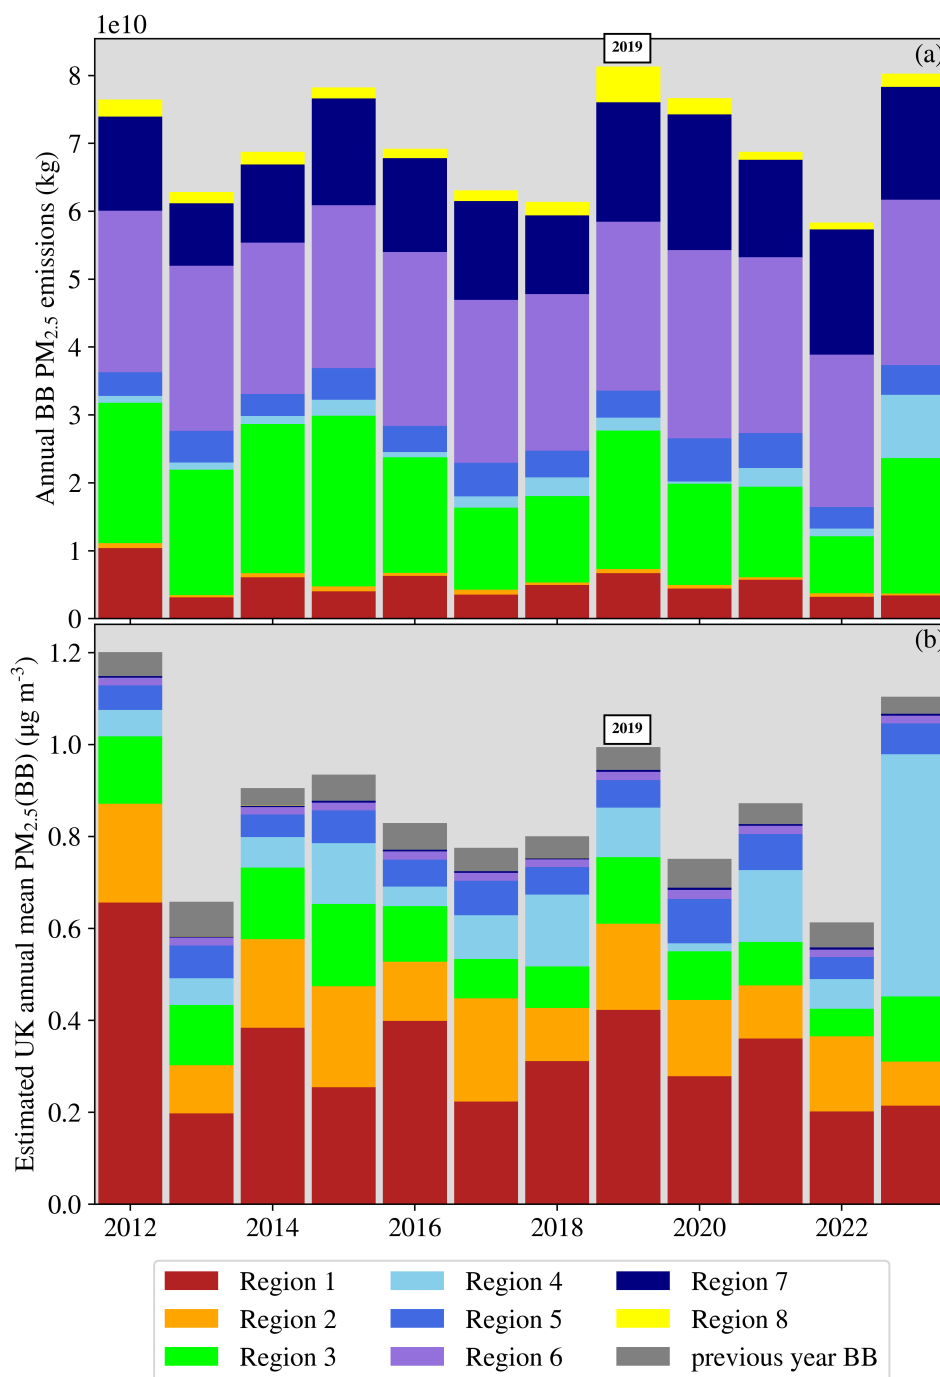

**Figure 5.** (a) The contributions from Regions 1-8 to annual global BB emissions of  $PM_{2.5}$  from 2012 to 2023, using data from FINNv2.5 (Wiedinmyer et al., 2023). Regions are defined in Figure 2. (b) An estimate of the contributions of the source region emissions shown in panel (a) to UK annual mean  $PM_{2.5}(BB)$  in 2012 to 2023, using 2019 as a reference year. The methodology and its assumptions are described in the main text. The bar for 2019 in plot (b) shows the absolute annual averages of Figure 4f.

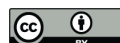

260 First, the multiplication factor required to convert the 2019 BB emissions of  $\text{PM}_{2.5}$  (Figure 5a) into the UK 2019 annual mean  $\text{PM}_{2.5}(\text{BB})$  for Regions 1-8 was calculated. This was applied to the annual BB emissions of  $\text{PM}_{2.5}$  for 2012 to 2023 to give the corresponding values in Figure 5b. The component attributed to BB in the previous year (grey stack in Figure 5b) was obtained by calculating a separate multiplication factor, relating the component of 2019 UK annual mean  $\text{PM}_{2.5}(\text{BB})$  attributed to BB in 2018 (grey stack in the 2019 bar in Figure 5b) with the estimated UK annual mean  $\text{PM}_{2.5}(\text{BB})$  for 2018 (excluding the  
 265 remaining component from 2017) (non-grey stacks in the 2018 bar in Figure 5b). This factor was then applied to each year,  $n - 1$ , between 2012 – 2022, to give the component of UK annual mean  $\text{PM}_{2.5}(\text{BB})$  in year  $n$  attributed to BB in year  $n - 1$ . The value for the year 2012 is an average of the years 2013 - 2023, as this is the earliest year for which the BB emissions data used here was available.

This methodology makes the assumptions that: (i) most importantly, annual source-receptor relationships hold across each  
 270 year, i.e. the combination of the locations and times of the BB emissions and the long-range meteorological transport in other years is similar to that in 2019; (ii) emissions of other species from BB, for example CO, are proportional to the trends in  $\text{PM}_{2.5}$  emissions (there is no reason why these proportions should vary substantially); (iii) anthropogenic emissions remain sufficiently similar across the time period that variations in oxidant fields and secondary aerosol formation depend principally on changes in magnitudes of BB emissions.

275 Whilst the values in Figure 5b include these assumptions, the figure provides an indication of the contributions of BB emissions to UK  $\text{PM}_{2.5}$  in all these other years without running an unfeasibly large number of sensitivity experiments. The 2023 estimate for Region 4 ( $0.5 \mu\text{g m}^{-3}$ ) can be validated by comparison to literature values of European  $\text{PM}_{2.5}$  exposure from the 2023 Canadian wildfires (Zhang et al., 2025). It is within the 95% confidence interval of  $0.32 - 0.50 \mu\text{g m}^{-3}$ , providing confidence that the assumptions made here are reasonable.

280 The mean contribution calculated across these years is  $0.87 \pm 0.17 \mu\text{g m}^{-3}$ , where the error bar is the associated standard deviation of the annual values. This weighting method suggests that 2019 is not an exceptional year for UK  $\text{PM}_{2.5}(\text{BB})$  (within one standard deviation of the mean), despite this year having high BB emissions globally. This is because inter-annual variability of UK  $\text{PM}_{2.5}(\text{BB})$  is dominated by variability in northern hemispheric BB emissions, particularly Regions 1, 2 and 4 (Figure 2), which are not exceptionally high in 2019. The contribution of BB in Region 4 (boreal North America), in particular,  
 285 is expected to be significantly larger in recent years, with intense wildfire activity in 2023 (Jones et al., 2024a; Zhang et al., 2025), 2024 and 2025 (Kelley et al., 2025).

#### 4.4 Study caveats

This study uses a single model – a novel, globally nested version of the EMEP4UK model. Model output will vary with the associated chemical and deposition schemes and meteorological model used, and the spatial resolution of the global model  
 290 run. It will also vary with the choice of anthropogenic and BB emissions datasets. For example, FINNv2.5 has generally larger emissions than other BB datasets (Wiedinmyer et al., 2023) such as FINNv1.5 (Wiedinmyer et al., 2011), GFED4 (Giglio et al., 2013) or Global Fire Assimilation System (GFAS)v1.2 (Kaiser et al., 2012). These caveats apply to any similar study using an atmospheric model.



The comparison between modelled and measured  $\text{PM}_{2.5}$  components for the model setup used here is discussed in Appendix B. Although, on an annual-mean scale the model overestimates total  $\text{PM}_{2.5}$  compared to measurements, the predominant contributor to this is the overestimation of sea salt, which has no influence on this study. It is not possible directly to validate model results of  $\text{PM}_{2.5}(\text{BB})$  and its components because measurement-based source apportionment approaches cannot distinguish between domestic wood burning and open BB, as their levoglucosan and potassium marker compounds are common to both sources. Measurements also cannot distinguish the portion of inorganic  $\text{NH}_4\text{NO}_3$  that depends on the BB impact on atmospheric oxidants. This illustrates the advantages of using ACTMs to reveal the complex relationship between source and receptor regions which measurements alone cannot.

While the specific numerical values of model output presented here are inevitably subject to much uncertainty, the use of a long-standing and well-validated ACTM and internationally-accepted input datasets provides confidence that these findings are broadly correct.

## 5 Conclusions

This study has highlighted that BB emissions can have significant impact on annual mean surface  $\text{PM}_{2.5}$  in locations such as the UK, that are generally well removed from the main regions of BB. The 2019 UK annual mean  $\text{PM}_{2.5}(\text{BB})$  of  $\sim 1 \mu\text{g m}^{-3}$  is highly policy relevant since it constitutes 10% of the annual mean total  $\text{PM}_{2.5}$  concentration, and 20% of the  $5 \mu\text{g m}^{-3}$  WHO guideline value for  $\text{PM}_{2.5}$  (WHO, 2021). The impact of BB emissions therefore needs to be considered when seeking to reduce  $\text{PM}_{2.5}$  concentrations towards the WHO guideline value. Since 97% and 73% of UK  $\text{PM}_{2.5}(\text{BB})$  are respectively associated with BB emissions outside the UK and outside the European model domain (Table 1c and Figure 1), it may appear at first sight that most of the  $\text{PM}_{2.5}(\text{BB})$  lies outside national, and even European, policy control. However, reducing local anthropogenic  $\text{NH}_3$  and  $\text{NO}_x$  emissions would contribute to mitigation of the SIA component conditional on BB emissions (which, for the UK in 2019, constituted 26% of  $\text{PM}_{2.5}(\text{BB})$ , see Table 1e).

These long-range impacts of BB can only be fully revealed with models that simulate atmospheric chemistry and transport processes at the global scale (or at least at the scale of the relevant northern or southern hemisphere). The need for a global-scale approach is particularly important when considering components of  $\text{PM}_{2.5}(\text{BB})$  that cannot be identified as a consequence of BB using measurements alone, for example the  $\text{NH}_4\text{NO}_3$  conditional on BB emissions that are a long distance from the receptor location (Tan et al., 2025).

The influence of  $\text{PM}_{2.5}(\text{BB})$  is likely to become relatively more important as nations seek to reduce local anthropogenic emissions, such that smaller transboundary contributions to  $\text{PM}_{2.5}$  pollution become more relevant. The proportion of  $\text{PM}_{2.5}$  in UK and Europe that is conditional on BB emissions is also likely to increase in future because literature suggests that this region will experience increases in wildfire frequency, magnitude and intensity (UNEP, 2022; Fernandez-Anez et al., 2021; Perry et al., 2022; Arnell et al., 2021; Burton et al., 2025; Albertson et al., 2010)), whilst conventional anthropogenic sources remain static or decrease further. There is indication that extratropical wildfires, which this study has shown to dominate the BB impacts on the UK, are particularly strongly influenced by climatic factors compared with human activity (Jones et al.,



2024b; Cunningham et al., 2024; Garroussi et al., 2024; Xie et al., 2022). This provides additional impetus for limiting climate change.

330 **Code availability.** EMEP MSC-W model code is available from the Norwegian Meteorological Institute GitHub pages (<https://github.com/metno/emep-ctm>). WRF model code is available from the Weather Research and Forecasting Model GitHub pages (<https://github.com/wrf-model/WRF>).

**Data availability.** EMEP MSC-W WRF model output used for this study will be made available prior to publication at <https://www.doi.org/10.5281/zenodo.17382060>.



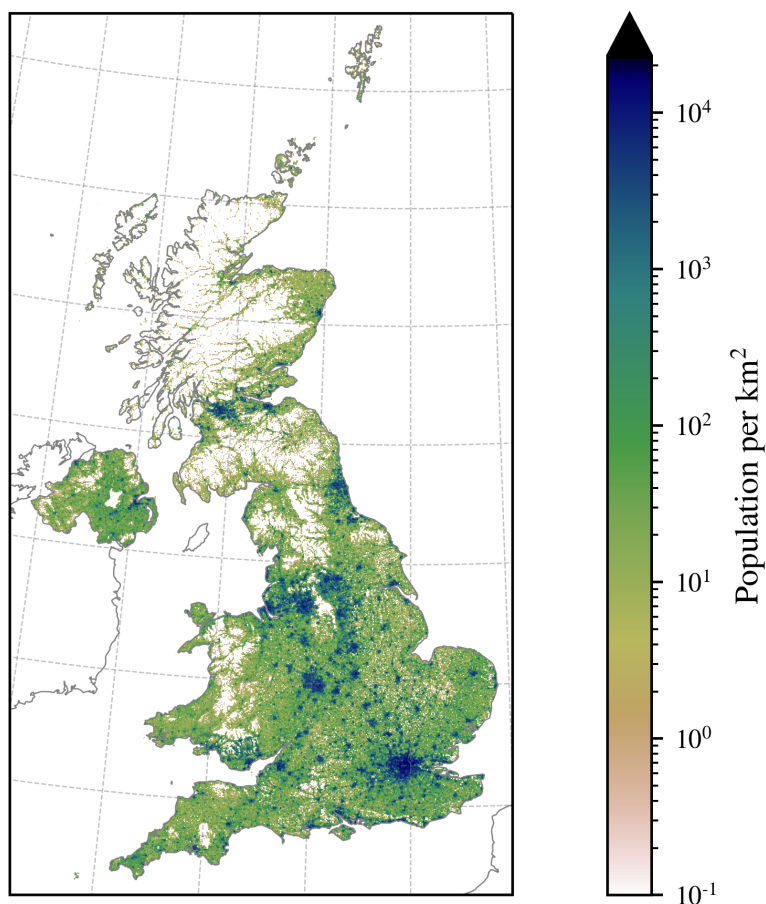

**Figure A1.** Gridded 2021 UK population data obtained from Carnell et al. (2025), which uses data from the 2022 (Scotland) and 2021 (rest of the UK) Censuses and a 2021 Land Cover Map.

## Appendix A: UK population and emissions

### 335 A1 UK population map

Figure A1 shows the gridded  $1 \text{ km} \times 1 \text{ km}$  UK population map from Carnell et al. (2025), which uses data from the 2022 (Scotland) and 2021 (rest of the UK) Censuses and a 2021 Land Cover Map. This population data was used to calculate the population-weighted means of  $\text{PM}_{2.5}$  conditional on biomass burning ( $\text{PM}_{2.5}(\text{BB})$ ) in Table 1 and Figure 4b in the main text.

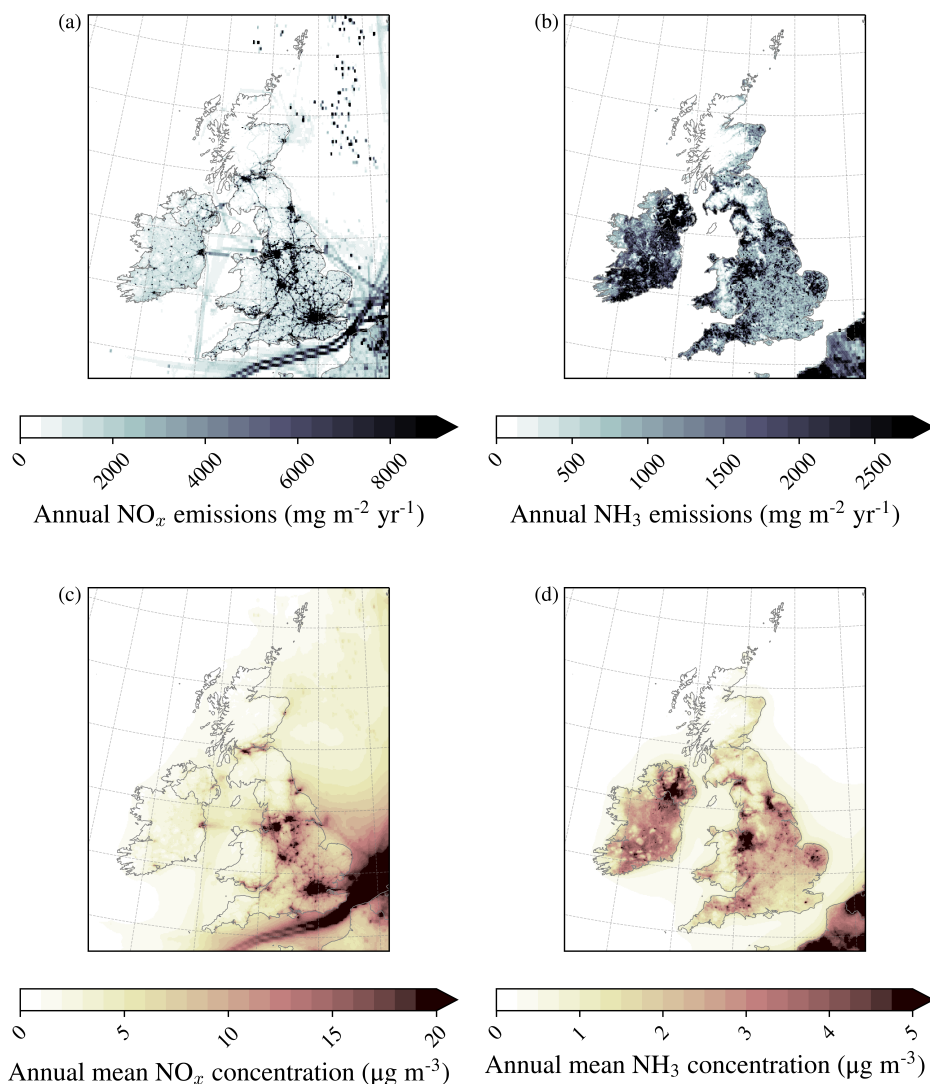

**Figure A2.** Total 2019 annual emissions (all sources) of (a)  $\text{NO}_x$  and (b)  $\text{NH}_3$  used in the BASE model run over domain C, and the resultant 2019 annual mean surface concentrations of (c)  $\text{NO}_x$  and (d)  $\text{NH}_3$ .

## A2 UK emissions and related concentrations

340 Figure A2 shows maps of total annual emissions from all sources of (a)  $\text{NO}_x$  and (b)  $\text{NH}_3$  used in the model's domain C, and the model simulated annual mean surface concentrations of (c)  $\text{NO}_x$  and (d)  $\text{NH}_3$ . These maps confirm that areas of largest  $\text{PM}_{2.5}(\text{BB})$  concentrations in the UK correspond to areas of large  $\text{NO}_x$  and  $\text{NH}_3$  emissions. This is because of the localised contribution of *in situ*  $\text{NH}_4\text{NO}_3$  formation conditional on changes in oxidant concentrations brought about by BB emissions (Tan et al., 2025).



## 345 **Appendix B: The globally nested EMEP4UK model**

EMEP4UK is a UK application of the EMEP MSC-W Eulerian ACTM (Simpson et al., 2012). In its standard configuration, EMEP4UK operates over the two domains labelled B and C in Figure 1 of the main paper. It utilises prescribed initial and boundary conditions for long-lived species, as described by Simpson et al. (2012). These derive from simple functions that vary with altitude, time, and in some cases with latitude. They apply to many components of  $PM_{2.5}$  such as  $SO_4^{2-}$ ,  $NO_3^-$ ,  $NH_4^+$  and sea salt, as well as species which influence  $PM_{2.5}$  components such as some VOCs, CO,  $NO_x$ , nitric acid ( $HNO_3$ ) and peroxyacyl nitrate (PAN). These boundary condition concentrations vary sinusoidally with time, and their magnitudes decay exponentially with height down to a minimum value. Ozone ( $O_3$ ) is treated differently, using the “Mace-Head correction”: climatological  $O_3$  data are adjusted to measurements at the Mace Head measuring station on the west coast of Ireland. Adjustments are made to all prescribed boundary conditions to account for long-term trends.

355 This study uses a different setup for the initial and boundary conditions of domain B, with the introduction of an additional global model run (domain A in Figure 1 of the main text). This provides boundary conditions for domain B which are based on 2019 BB emissions and the 2019 meteorological year. Initial conditions are provided by running the model over domain A for the previous year (2018) to allow for the spin-up of long-lived species. This setup is required when considering the impact of BB emissions, as the majority of BB occurs outside the standard EMEP4UK domains (see Figure 5 in the main text), and the  
 360 initial and boundary conditions of the standard EMEP4UK setup cannot capture the highly episodic nature of these emissions.

Figure B1 compares the 2019 annual mean concentrations of the  $SO_4^{2-}$ ,  $NO_3^-$ ,  $NH_4^+$ , BC, organic matter (OM), dust and sea salt components of  $PM_{2.5}$ , from the standard (left bar) and globally nested (middle bar) model setups, and from measurements (right bar), at the (a) Auchencorth Moss, (b) London Honor Oak Park, and (c) Chilbolton Observatory sites. The locations of these sites are shown in the bottom right panel of the figure. Auchencorth Moss and Chilbolton Observatory are rural  
 365 background sites, whilst London Honor Oak Park is an urban background site. These are the only background sites in the UK that measure the majority of the components of  $PM_{2.5}$ . Only background sites were chosen to assess the performance of long-range transport for both model setups because sites near to sources contributing to  $PM_{2.5}$  concentrations show strong spatial gradients that cannot be resolved by regional ACTMs. Sites (b) and (c) are located in the part of the UK that is most strongly influenced by  $PM_{2.5}$  conditional on BB (see Figure 3 of the main text). Measurements were taken from the UK Air  
 370 data archive (DEFRA, 2025), using all available measurements for a given component to calculate a ‘best possible’ annual mean concentration for that component at that site. Site (b) did not have BC measurements for 2019, so this has been omitted in all bars of Figure B1b to allow a like-for-like comparison. Both measurements (where available) and modelling agree that concentrations of BC are small in comparison to the concentrations of other components considered here.

OM at sites (a) and (c) was calculated from measurements of organic carbon by transmittance, using a rural background  
 375 organic mass upscaling factor of 2.1 (Font et al., 2024). A conversion factor was not required for site (b), as this site has an Aerosol Chemical Speciation Monitor (ACSM) that provides concentrations of OM directly. The measured sea salt concentration was calculated from measurements of sodium ( $Na^+$ ) in  $PM_{2.5}$ , using known mass ratios to sea salt and its ionic components (Seinfeld and Pandis, 2016; Twigg et al., 2015). Values for measured dust were derived by scaling measured calcium ( $Ca^{2+}$ )



concentrations under the arbitrary assumption that dust comprises one-third calcium carbonate. There were no measurements  
 380 of crustal elements such as Fe, Al, Si and Ti with which to attempt a more sophisticated estimation of dust concentrations. The  
 uncertainty in quantifying a measured dust component is not important, however, since Figure B1 shows that both modelling  
 and measurement agree that dust is a minor component of  $PM_{2.5}$  at these sites. In addition to all the uncertainties inherent  
 in the methodologies used to derive the modelled and measured concentrations for each of these components, any model-  
 measurement comparison is also subject to uncertainties associated with incomplete temporal coverage in the measurements  
 385 and comparison between a point measurement and a  $3 \text{ km} \times 3 \text{ km}$  grid average.

Figure B1 shows that the major components at each site are the secondary inorganic components ( $SO_4^{2-}$ ,  $NO_3^-$ ,  $NH_4^+$ ),  
 OM and sea salt. Although at first glance it appears that the globally nested version of EMEP4UK overestimates compared  
 to measurements, the majority of the overestimation lies within the sea salt component (for all three sites), as well as the  
 contribution from OM at site (a). The percentage overestimations of the modelled estimates of sea salt compared with the  
 390 measurements at the three sites are (a) 109%, (b) 193% and (c) 44%. This overestimation of sea salt for UK sites is due to  
 changes made in recent versions of the EMEP MSC-W model code to attribute a larger percentage of the sea salt to the fine  
 particulate matter fraction (Fagerli et al., 2021). This was done to improve model performance over Continental Europe, a  
 long way from the sea, but has had the consequence of increasing modelled concentrations of sea salt over the UK, situated  
 on the edge of the Atlantic Ocean and experiencing predominantly westerly air flow. In contrast, the global model inorganic  
 395 components generally compare very well with the measurements, with percentage differences of (a) 36%, (b) 10% and (c) -1%.  
 The OM component derived using the globally nested model compares well at sites (b) and (c), with percentage differences of  
 6% and 10% respectively, but is overestimated at site (a) by 121%.

The standard configuration of EMEP4UK generally underestimates somewhat compared to measurements at all three sites,  
 with the exception of the sea salt component; for the same reasons as for the globally nested setup of the model, sea salt is  
 400 overestimated at sites (a) and (b) by 38% and 81%, respectively. The sea salt overestimation is smaller in this model setup  
 because of the lower amount of ocean surface contained within the standard configuration of EMEP4UK, especially for the  
 southwest wind direction which tends to be associated with the largest wind speeds and sea salt concentrations. There is good  
 agreement for sea salt at site (c) with a model-measurement difference of -12%. The OM in the standard model configuration  
 compares well with measurements at site (a) with a percentage difference of -6%, but underestimates at the other sites with  
 405 percentage differences of (b) -45% and (c) -49% (these are the two sites most influenced by  $PM_{2.5}$  conditional on BB). This is  
 explained by the standard model's failure to capture OM from very long-range transport which originates from beyond model  
 domain B and is also not accounted for in the boundary concentrations. On the other hand, the inorganic components are again  
 well represented by the standard configuration of the model, with percentage differences of (a) 7%, (b) -11% and (c) -20%.  
 This indicates that, in general, long-range transport of SIA from outside model domain B is less of an issue due to its shorter  
 410 atmospheric lifetime. The standard model setup will not, however, accurately capture the SIA component conditional on BB,  
 which is dependent on the long-range transport of oxidant drivers emitted by BB, but any underestimation is within the range  
 of uncertainty associated with this model-measurement comparison.

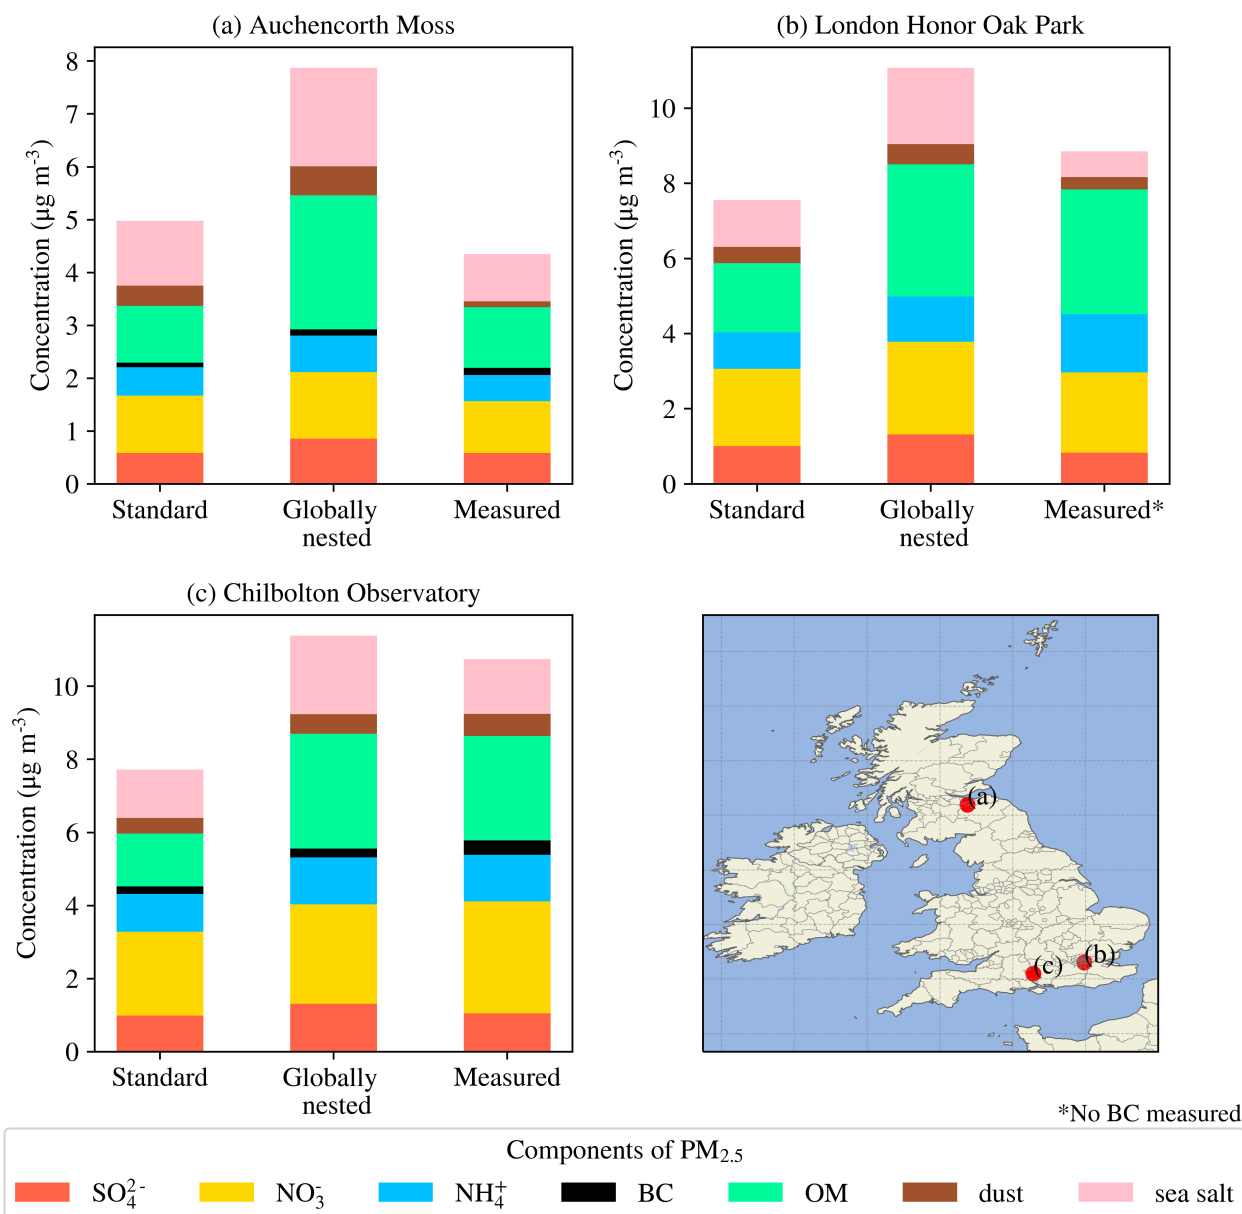

**Figure B1.** Comparison between modelled and measurement-derived  $\text{SO}_4^{2-}$ ,  $\text{NO}_3^-$ ,  $\text{NH}_4^+$ , BC, OM, dust and sea salt components of  $\text{PM}_{2.5}$  at (a) Auchencorth Moss, (b) London Honor Oak Park and (c) Chilbolton Observatory measurement sites. Sites (a) and (c) are rural background sites, (b) is an urban background site. Site locations are shown in the bottom right panel. The left and middle bar of each panel show the 2019 annual modelled mean concentrations calculated using the standard and globally nested configurations of EMEP4UK, respectively, for the model grid containing the measurement site. The concentrations for each component in the right bar are the averages calculated using all available measurements in 2019 for that component at that site. Measurements were taken from the UK Air data archive (DEFRA, 2025). There were no measurements of BC at site (b) in 2019, so BC has also been omitted from the modelled data at this site.

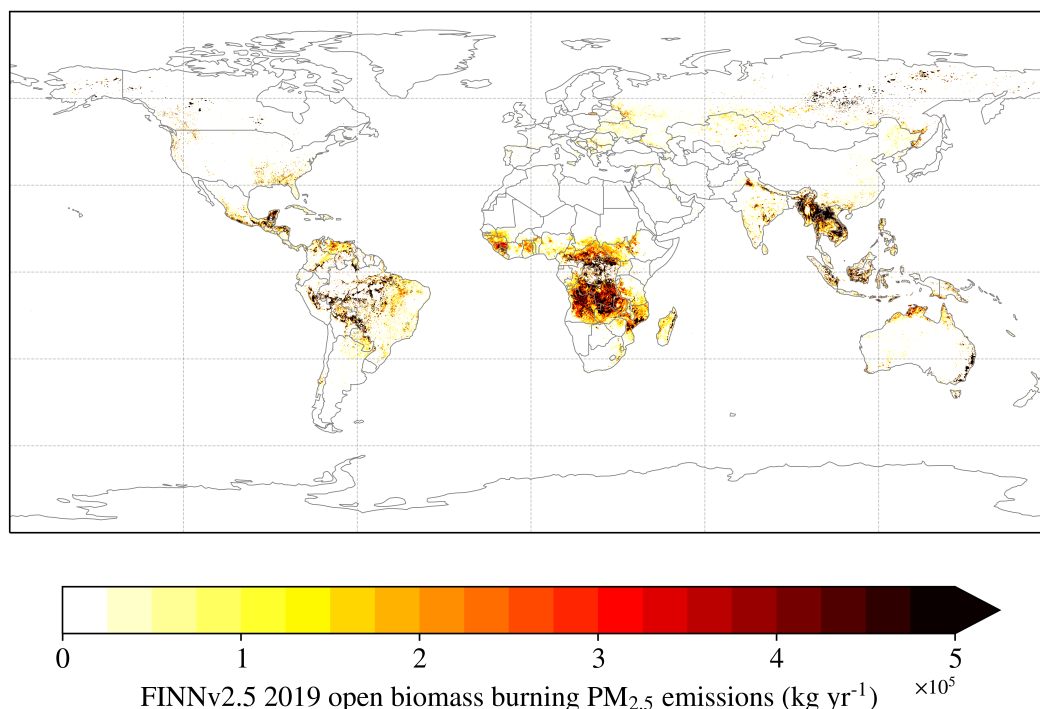

**Figure C1.** The spatial distribution of 2019 global BB PM<sub>2.5</sub> emissions as reported in the FINNv2.5 dataset (Wiedinmyer et al., 2023).

### Appendix C: Biomass burning emissions

The global distribution of annual BB emissions of PM<sub>2.5</sub> for 2019, as estimated by FINNv2.5 (Wiedinmyer et al., 2023), are  
 415 plotted in Figure C1. The map highlights Central and South America, Central Africa, Siberia, Southeast Asia, and southeastern  
 Australia as regions with large BB emissions. The FINNv2.5 dataset is the source of the data plotted in Figure 5a in the main  
 text.





*Author contributions.* DYTT performed model simulations, data analyses and wrote the text under supervision by MRH, MV, DSS, SR and EN. MRH, DSS, SR and EN edited and commented on the text.

420 *Competing interests.* Not applicable.

*Disclaimer.* Not applicable.

*Acknowledgements.* The authors acknowledge helpful discussions with Marsailidh Twigg and the UK Centre for Ecology & Hydrology's air quality modelling group (Janice Scheffler, Yuanlin Wang, Tomáš Liška, Christina Hood).

This work has been supported by the UK Department for the Environment, Food and Rural Affairs (Defra) under Contract ECM-53210:  
425 Support for national air pollution control strategies (including studentship funding for DYTT). This work was partially supported by the following UK Research and Innovation (UKRI) grants: the UKCEH National Capability for UK Challenges programme (NE/Y006208/1), the UKCEH National Capability for Global Challenges programme (NE/X006247/1) and the UKRI GCRF South Asian Nitrogen Hub (NE/S009019/1). The findings and discussions presented here are those of the authors and do not necessarily represent the views of the funders.



## 430 References

- Ahern, A. T., Robinson, E. S., Tkacik, D. S., Saleh, R., Hatch, L. E., Barsanti, K. C., Stockwell, C. E., Yokelson, R. J., Presto, A. A., Robinson, A. L., Sullivan, R. C., and Donahue, N. M.: Production of Secondary Organic Aerosol During Aging of Biomass Burning Smoke From Fresh Fuels and Its Relationship to VOC Precursors, *Journal of Geophysical Research: Atmospheres*, 124, 3583–3606, <https://doi.org/10.1029/2018JD029068>, 2019.
- 435 Albertson, K., Aylen, J., Cavan, G., and McMorrow, J.: Climate change and the future occurrence of moorland wildfires in the Peak District of the UK, *Climate Research*, 45, 105–118, <https://doi.org/10.3354/cr00926>, 2010.
- Arnell, N. W., Freeman, A., and Gazzard, R.: The effect of climate change on indicators of fire danger in the UK, *Environmental Research Letters*, 16, 044 027, <https://doi.org/10.1088/1748-9326/abd9f2>, 2021.
- Bergström, R., Denier van der Gon, H. A. C., Prévôt, A. S. H., Yttri, K. E., and Simpson, D.: Modelling of organic aerosols over Europe (2002–2007) using a volatility basis set (VBS) framework: application of different assumptions regarding the formation of secondary organic aerosol, *Atmospheric Chemistry and Physics*, 12, 8499–8527, <https://doi.org/10.5194/acp-12-8499-2012>, 2012.
- 440 Bergström, R., Hayman, G. D., Jenkin, M. E., and Simpson, D.: Update and comparison of atmospheric chemistry mechanisms for the EMEP MSC-W model system-EmChem19a, EmChem19X, CRIv2R5Em, CB6r2Em, and MCMv3.3Em, Norwegian Meteorological Institute, [https://emep.int/publ/reports/2022/MSCW\\_technical\\_1\\_2022.pdf](https://emep.int/publ/reports/2022/MSCW_technical_1_2022.pdf), 2022.
- 445 Binkowski, F. S. and Shankar, U.: The Regional Particulate Matter Model: 1. Model description and preliminary results, *Journal of Geophysical Research: Atmospheres*, 100, 26 191–26 209, <https://doi.org/10.1029/95JD02093>, 1995.
- Bondur, V. G., Mokhov, I. I., Voronova, O. S., and Sitnov, S. A.: Satellite Monitoring of Siberian Wildfires and Their Effects: Features of 2019 Anomalies and Trends of 20-Year Changes, *Doklady Earth Sciences*, 492, 370–375, <https://doi.org/10.1134/S1028334X20050049>, 2020.
- 450 Bowman, D. M., Kolden, C. A., Abatzoglou, J. T., Johnston, F. H., van der Werf, G. R., and Flannigan, M.: Vegetation fires in the Anthropocene, *Nature Reviews Earth and Environment*, 1, 500–515, <https://doi.org/10.1038/s43017-020-0085-3>, 2020.
- Burton, C., Ciavarella, A., Kelley, D. I., Hartley, A. J., McCarthy, M., New, S., Betts, R. A., and Robertson, E.: Very high fire danger in UK in 2022 at least 6 times more likely due to human-caused climate change, *Environmental Research Letters*, 20, 044 003, <https://doi.org/10.1088/1748-9326/adb764>, 2025.
- 455 Carnell, E., Tomlinson, S., and Reis, S.: UK gridded population at 1 km resolution for 2021 based on Census 2021/2022 and Land Cover Map 2021. NERC EDS Environmental Information Data Centre, <https://doi.org/10.5285/7beefde9-c520-4ddf-897a-0167e8918595>, 2025.
- CEIP: EMEP Centre on Emission Inventories and Projections, <https://www.ceip.at/>, accessed: 2021-11-24, 2021.
- Cho, Y., Kim, H., Park, R. J., and Kim, S.-W.: Unprecedented East Siberian wildfires intensify Arctic snow darkening through enhanced poleward transport of black carbon, *Science of The Total Environment*, 961, 178 423, <https://doi.org/10.1016/j.scitotenv.2025.178423>,
- 460 2025.
- Ciais, P., Wattenbach, M., Vuichard, N., Smith, P., Piao, S. L., Don, A., Luyssaert, S., Janssens, I. A., Bondeau, A., Dechow, R., Leip, A., Smith, P., Beer, C., van der Werf, G. R., Gervois, S., Van Oost, K., Tomelleri, E., Freibauer, A., Schulze, E. D., and Team, C. S.: The European carbon balance. Part 2: croplands, *Global Change Biology*, 16, 1409–1428, <https://doi.org/10.1111/j.1365-2486.2009.02055.x>, 2010.
- 465 Copernicus: Did 2019 really bring us an unusual number of wildfires?, <https://atmosphere.copernicus.eu/did-2019-really-bring-us-unusual-number-wildfires>, accessed: 2025-08-11, 2019.

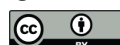

- Cottle, P., Strawbridge, K., and McKendry, I.: Long-range transport of Siberian wildfire smoke to British Columbia: Lidar observations and air quality impacts, *Atmospheric Environment*, 90, 71–77, <https://doi.org/10.1016/j.atmosenv.2014.03.005>, 2014.
- Crippa, M., Guizzardi, D., Butler, T., Keating, T., Wu, R., Kaminski, J., Kuenen, J., Kurokawa, J., Chatani, S., Morikawa, T., Pouliot, G.,  
 470 Racine, J., Moran, M. D., Klimont, Z., Manseau, P. M., Mashayekhi, R., Henderson, B. H., Smith, S. J., Suchyta, H., Muntean, M., Solazzo,  
 E., Banja, M., Schaaf, E., Pagani, F., Woo, J.-H., Kim, J., Monforti-Ferrario, F., Pisoni, E., Zhang, J., Niemi, D., Sassi, M., Ansari, T., and  
 Foley, K.: The HTAP\_v3 emission mosaic: merging regional and global monthly emissions (2000–2018) to support air quality modelling  
 and policies, *Earth System Science Data*, 15, 2667–2694, <https://doi.org/10.5194/essd-15-2667-2023>, 2023.
- Cunningham, C. X., Williamson, G. J., and Bowman, D. M.: Increasing frequency and intensity of the most extreme wildfires on Earth,  
 475 *Nature Ecology and Evolution*, 8, 1420–1425, <https://doi.org/10.1038/s41559-024-02452-2>, 2024.
- Davey, S. M. and Sarre, A.: Editorial: the 2019/20 Black Summer bushfires, *Australian Forestry*, 83, 47–51,  
<https://doi.org/10.1080/00049158.2020.1769899>, 2020.
- DEFRA: UK AIR Data Archive, <https://uk-air.defra.gov.uk/data/>, accessed: 2025-09-26, 2025.
- Department of Environmental Science at Aarhus University with the Irish EPA: National mapping of GHG and non-GHG emissions sources  
 480 (MapEire), <https://projects.au.dk/mapeire>, accessed: 2021-10-07, 2021.
- Diapouli, E., Popovicheva, O., Kistler, M., Vratolis, S., Persiantseva, N., Timofeev, M., Kasper-Giebl, A., and Eleftheriadis, K.: Physico-  
 chemical characterization of aged biomass burning aerosol after long-range transport to Greece from large scale wildfires in Russia and  
 surrounding regions, Summer 2010, *Atmospheric Environment*, 96, 393–404, <https://doi.org/10.1016/j.atmosenv.2014.07.055>, 2014.
- Donahue, N. M., Robinson, A. L., Stanier, C. O., and Pandis, S. N.: Coupled Partitioning, Dilution, and Chemical Aging of Semivolatile  
 485 Organics, *Environmental Science & Technology*, 40, 2635–2643, <https://doi.org/10.1021/es052297c>, 2006.
- Fagerli, H., Tsyro, S., Simpson, D., Ágnes Nyíri, Wind, P., Gauss, M., Benedictow, A., Klein, H., Valdebenito, A., Mu, Q., Waersted, E. G.,  
 Gliß, J., Brenna, H., Mortier, A., EMEP, J. G., Aas, W., Hjellbrekke, A., Solberg, S., Tørseth, K., Yttri, K. E., Mareckova, K., Matthews,  
 B., Schindlbacher, S., Ullrich, B., CCE, R. W., TNO, T. S., and Kuenen, J. J.: Transboundary particulate matter, photo-oxidants, acidifying  
 and eutrophying components, Norwegian Meteorological Institute, [https://emep.int/publ/reports/2021/EMEP\\_Status\\_Report\\_1\\_2021.pdf](https://emep.int/publ/reports/2021/EMEP_Status_Report_1_2021.pdf),  
 490 2021.
- Fagerli, H., Benedictow, A., Caspel, W. V., Gauss, M., Ge, Y., Jonson, J. E., Klein, H., Ágnes Nyíri, Simpson, D., Tsyro, S., Aas, W.,  
 Hjellbrekke, A., Solberg, S., Tørseth, K., Espen, K., Emep, Y., Ceip, ., Matthews, B., Schindlbacher, S., Ullrich, B., Wankmüller, R.,  
 Ciam, E. ., Klimont, Z., Uba, C. ., Scheuschner, T., Kuenen, J. J. P., and Wegener, R.: EMEP Status Report 1/2023: Transboundary  
 particulate matter, photo-oxidants, acidifying and eutrophying components, Norwegian Meteorological Institute, [https://emep.int/publ/reports/2023/EMEP\\_Status\\_Report\\_1\\_2023.pdf](https://emep.int/publ/reports/2023/EMEP_Status_Report_1_2023.pdf), 2023.  
 495
- Fagerli, H., Benedictow, A., Blake, L., van Caspel, W., Denby, B. R., Gauss, M., Jonson, J. E., Klein, H., Lange, G. F., Mousing, E. A., Nyíri,  
 A., Olivié, D., Segers, A., Simpson, D., Tsyro, S., Valdebenito, A., Wind, P., Aas, W., Fiebig, M., Hjellbrekke, A., Solberg, S., Tørseth,  
 K., Yttri, K. E., Redeyoff, O., Matthews, B., Schindlbacher, S., Ullrich, B., Wankmüller, R., Scheuschner, T., Kuenen, J. P., Guevara, M.,  
 I Jaffrezo, J., Dominutti, P., Uzu, G., Conil, S., Favez, O., and Močnik, G.: Convention on Long-range Transboundary Air Pollution Co-  
 500 operative programme for monitoring and evaluation of the lang-range transmission of air pollutants in Europe, Norwegian Meteorological  
 Institute, [https://emep.int/publ/reports/2024/EMEP\\_Status\\_Report\\_1\\_2024.pdf](https://emep.int/publ/reports/2024/EMEP_Status_Report_1_2024.pdf), 2024.
- Fernandez-Anez, N., Krasovskiy, A., Müller, M., Vacik, H., Baetens, J., Hukić, E., Solomun, M. K., Atanassova, I., Glushkova, M., Bo-  
 gunović, I., Fajković, H., Djuma, H., Boustras, G., Adámek, M., Devetter, M., Hrabalíkova, M., Huska, D., Barroso, P. M., Vaverková,  
 M. D., Zumr, D., Jögiste, K., Metslaid, M., Koster, K., Köster, E., Pumpanen, J., Ribeiro-Kumara, C., Prima, S. D., Pastor, A., Rumpel,

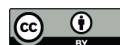

- 505 C., Seeger, M., Daliakopoulos, I., Daskalakou, E., Koutroulis, A., Papadopoulou, M. P., Stampoulidis, K., Xanthopoulos, G., Aszalós, R., Balázs, D., Kertész, M., Valkó, O., Finger, D. C., Thorsteinsson, T., Till, J., Bajocco, S., Gelsomino, A., Amodio, A. M., Novara, A., Salvati, L., Telesca, L., Ursino, N., Jansons, A., Kitenberga, M., Stivrins, N., Brazaitis, G., Marozas, V., Cojocar, O., Gumeniuc, I., Sfecla, V., Imeson, A., Veraverbeke, S., Mikalsen, R. F., Koda, E., Osinski, P., Castro, A. C. M., Nunes, J. P., Oom, D., Vieira, D., Rusu, T., Bojović, S., Djordjevic, D., Popovic, Z., Protic, M., Sakan, S., Glasa, J., Kacikova, D., Lichner, L., Majlingova, A., Vido, J., Ferk, 510 M., Tičar, J., Zorn, M., Zupanc, V., Hinojosa, M. B., Knicker, H., Lucas-Borja, M. E., Pausas, J., Prat-Guitart, N., Ubeda, X., Vilar, L., Destouni, G., Ghajarnia, N., Kalantari, Z., Seifollahi-Aghmiuni, S., Dindaroglu, T., Yakupoglu, T., Smith, T., Doerr, S., and Cerda, A.: Current Wildland Fire Patterns and Challenges in Europe: A Synthesis of National Perspectives, *Air, Soil and Water Research*, 14, 1–19, <https://doi.org/10.1177/11786221211028185>, 2021.
- Font, A., F. de Brito, J., Riffault, V., Conil, S., Jaffrezo, J.-L., and Bourin, A.: Calculations of the conversion factor from organic carbon to 515 organic matter for aerosol mass balance, *Atmospheric Pollution Research*, 15, 102 301, <https://doi.org/10.1016/j.apr.2024.102301>, 2024.
- Garcia, A., Santa-Helena, E., Falco, A. D., de Paula Ribeiro, J., Gioda, A., and Gioda, C. R.: Toxicological Effects of Fine Particulate Matter (PM<sub>2.5</sub>): Health Risks and Associated Systemic Injuries—Systematic Review, *Water, Air, and Soil Pollution*, 234, 346, <https://doi.org/10.1007/s11270-023-06278-9>, 2023.
- Garroussi, S. E., Giuseppe, F. D., Barnard, C., and Wetterhall, F.: Europe faces up to tenfold increase in extreme fires in a warming climate, 520 *npj Climate and Atmospheric Science*, 7, <https://doi.org/10.1038/s41612-024-00575-8>, 2024.
- Ge, Y., Heal, M. R., Stevenson, D. S., Wind, P., and Vieno, M.: Evaluation of global EMEP MSC-W (rv4.34) WRF (v3.9.1.1) model surface concentrations and wet deposition of reactive N and S with measurements, *Geoscientific Model Development*, 14, 7021–7046, <https://doi.org/10.5194/gmd-14-7021-2021>, 2021.
- Giglio, L., Randerson, J. T., and van der Werf, G. R.: Analysis of daily, monthly, and annual burned area using the fourth-generation global 525 fire emissions database (GFED4), *Journal of Geophysical Research: Biogeosciences*, 118, 317–328, <https://doi.org/10.1002/jgrg.20042>, 2013.
- Graham, A. M., Pope, R. J., Pringle, K. P., Arnold, S., Chipperfield, M. P., Conibear, L. A., Butt, E. W., Kiely, L., Knotte, C., and McQuaid, J. B.: Impact on air quality and health due to the Saddleworth Moor fire in northern England, *Environmental Research Letters*, 15, 074 018, <https://doi.org/10.1088/1748-9326/ab8496>, 2020.
- 530 Harper, A. R., Doerr, S. H., Santin, C., Froyd, C. A., and Sinnadurai, P.: Prescribed fire and its impacts on ecosystem services in the UK, *Science of The Total Environment*, 624, 691–703, <https://doi.org/10.1016/j.scitotenv.2017.12.161>, 2018.
- He, Y., Zhao, B., Wang, S., Valorso, R., Chang, X., Yin, D., Feng, B., Camredon, M., Aumont, B., Dearden, A., Jathar, S. H., Shrivastava, M., Jiang, Z., Cappa, C. D., Yee, L. D., Seinfeld, J. H., Hao, J., and Donahue, N. M.: Formation of secondary organic aerosol from wildfire emissions enhanced by long-time ageing, *Nature Geoscience*, 17, 124–129, <https://doi.org/10.1038/s41561-023-01355-4>, 2024.
- 535 Hessburg, P. F., Prichard, S. J., Hagmann, R. K., Povak, N. A., and Lake, F. K.: Wildfire and climate change adaptation of western North American forests: a case for intentional management, *Ecological Applications*, 31, e02 432, <https://doi.org/10.1002/eap.2432>, 2021.
- Hodshire, A. L., Akherati, A., Alvarado, M. J., Brown-Steiner, B., Jathar, S. H., Jimenez, J. L., Kreidenweis, S. M., Lonsdale, C. R., Onasch, T. B., Ortega, A. M., and Pierce, J. R.: Aging Effects on Biomass Burning Aerosol Mass and Composition: A Critical Review of Field and Laboratory Studies, *Environmental Science and Technology*, 53, 10 007–10 022, <https://doi.org/10.1021/acs.est.9b02588>, 2019.
- 540 HTAP: HTAPv3 mosaic, [https://edgar.jrc.ec.europa.eu/dataset\\_htap\\_v3](https://edgar.jrc.ec.europa.eu/dataset_htap_v3), accessed: 2024-12-03, 2024.



- Jiang, Y., Lu, Z., Liu, X., Qian, Y., Zhang, K., Wang, Y., and Yang, X.-Q.: Impacts of global open-fire aerosols on direct radiative, cloud and surface-albedo effects simulated with CAM5, *Atmospheric Chemistry and Physics*, 16, 14 805–14 824, <https://doi.org/10.5194/acp-16-14805-2016>, 2016.
- Jones, M. W., Kelley, D. I., Burton, C. A., Di Giuseppe, F., Barbosa, M. L. F., Brambleby, E., Hartley, A. J., Lombardi, A., Mataveli, G.,  
 545 McNorton, J. R., Spuler, F. R., Wessel, J. B., Abatzoglou, J. T., Anderson, L. O., Andela, N., Archibald, S., Armenteras, D., Burke, E., Carmenta, R., Chuvieco, E., Clarke, H., Doerr, S. H., Fernandes, P. M., Giglio, L., Hamilton, D. S., Hantson, S., Harris, S., Jain, P., Kolden, C. A., Kurvits, T., Lampe, S., Meier, S., New, S., Parrington, M., Perron, M. M. G., Qu, Y., Ribeiro, N. S., Saharjo, B. H., San-Miguel-Ayanz, J., Shuman, J. K., Tanpipat, V., van der Werf, G. R., Veraverbeke, S., and Xanthopoulos, G.: State of Wildfires 2023–2024, *Earth System Science Data*, 16, 3601–3685, <https://doi.org/10.5194/essd-16-3601-2024>, 2024a.
- 550 Jones, M. W., Veraverbeke, S., Andela, N., Doerr, S. H., Kolden, C., Mataveli, G., Pettinari, M. L., Quéré, C. L., Rosan, T. M., van der Werf, G. R., van Wees, D., and Abatzoglou, J. T.: Global rise in forest fire emissions linked to climate change in the extratropics, *Science*, 386, eadl5889, <https://doi.org/10.1126/science.adl5889>, 2024b.
- Kaiser, J. W., Heil, A., Andreae, M. O., Benedetti, A., Chubarova, N., Jones, L., Morcrette, J.-J., Razinger, M., Schultz, M. G., Suttie, M., and van der Werf, G. R.: Biomass burning emissions estimated with a global fire assimilation system based on observed fire radiative  
 555 power, *Biogeosciences*, 9, 527–554, <https://doi.org/10.5194/bg-9-527-2012>, 2012.
- Kelley, D. I., Burton, C., Di Giuseppe, F., Jones, M. W., Barbosa, M. L. F., Brambleby, E., McNorton, J. R., Liu, Z., Bradley, A. S. I., Blackford, K., Burke, E., Ciavarella, A., Di Tomaso, E., Eden, J., Ferreira, I. J. M., Fiedler, L., Hartley, A. J., Keeping, T. R., Lampe, S., Lombardi, A., Mataveli, G., Qu, Y., Silva, P. S., Spuler, F. R., Steinmann, C. B., Torres-Vázquez, M. A., Veiga, R., van Wees, D., Wessel, J. B., Wright, E., Bilbao, B., Bourbonnais, M., Cong, G., Di Bella, C. M., Dintwe, K., Donovan, V. M., Harris, S., Kukavskaya,  
 560 E. A., N'Dri, B., Santfín, C., Selaya, G., Sjöström, J., Abatzoglou, J., Andela, N., Carmenta, R., Chuvieco, E., Giglio, L., Hamilton, D. S., Hantson, S., Meier, S., Parrington, M., Sadegh, M., San-Miguel-Ayanz, J., Sedano, F., Turco, M., van der Werf, G. R., Veraverbeke, S., Anderson, L. O., Clarke, H., Fernandes, P. M., and Kolden, C. A.: State of Wildfires 2024–25, *Earth System Science Data Discussions*, 2025, 1–179, <https://doi.org/10.5194/essd-2025-483>, 2025.
- Kelly, L. T., Giljohann, K. M., Duane, A., Aquilué, N., Archibald, S., Batllori, E., Bennett, A. F., Buckland, S. T., Canelles, Q., Clarke, M. F.,  
 565 Fortin, M.-J., Hermoso, V., Herrando, S., Keane, R. E., Lake, F. K., McCarthy, M. A., Morán-Ordóñez, A., Parr, C. L., Pausas, J. G., Penman, T. D., Regos, A., Rumpff, L., Santos, J. L., Smith, A. L., Syphard, A. D., Tingley, M. W., and Brotons, L.: Fire and biodiversity in the Anthropocene, *Science*, 370, eabb0355, <https://doi.org/10.1126/science.abb0355>, 2020.
- Keywood, M., Kanakidou, M., Stohl, A., Dentener, F., Grassi, G., Meyer, C. P., Torseth, K., Edwards, D., Thompson, A. M., Lohmann, U., and Burrows, J.: Fire in the Air: Biomass Burning Impacts in a Changing Climate, *Critical Reviews in Environmental Science and  
 570 Technology*, 43, 40–83, <https://doi.org/10.1080/10643389.2011.604248>, 2013.
- Lasslop, G., Coppola, A. I., Voulgarakis, A., Yue, C., and Veraverbeke, S.: Influence of Fire on the Carbon Cycle and Climate, *Current Climate Change Reports*, 5, 112–123, <https://doi.org/10.1007/s40641-019-00128-9>, 2019.
- Lim, C. Y., Hagan, D. H., Coggon, M. M., Koss, A. R., Sekimoto, K., de Gouw, J., Warneke, C., Cappa, C. D., and Kroll, J. H.: Secondary organic aerosol formation from the laboratory oxidation of biomass burning emissions, *Atmospheric Chemistry and Physics*, 19, 12 797–  
 575 12 809, <https://doi.org/10.5194/acp-19-12797-2019>, 2019.
- Lin, C., Heal, M. R., Vieno, M., MacKenzie, I. A., Armstrong, B. G., Butland, B. K., Milojevic, A., Chalabi, Z., Atkinson, R. W., Stevenson, D. S., Doherty, R. M., and Wilkinson, P.: Spatiotemporal evaluation of EMEP4UK-WRF v4.3 atmospheric chemistry transport simu-



- lations of health-related metrics for NO<sub>2</sub>, O<sub>3</sub>, PM<sub>10</sub>, and PM<sub>2.5</sub> for 2001–2010, *Geoscientific Model Development*, 10, 1767–1787, <https://doi.org/10.5194/gmd-10-1767-2017>, 2017.
- 580 Liška, T., Heal, M. R., Lin, C., Vieno, M., Carnell, E. J., Tomlinson, S. J., Loh, M., and Reis, S.: The effect of workplace mobility on air pollution exposure inequality—a case study in the Central Belt of Scotland, *Environmental Research: Health*, 2, 025 006, <https://doi.org/10.1088/2752-5309/ad3840>, 2024.
- Macintyre, H. L., Mitsakou, C., Vieno, M., Heal, M. R., Heaviside, C., and Exley, K. S.: Impacts of emissions policies on future UK mortality burdens associated with air pollution, *Environment International*, 174, 107 862, <https://doi.org/10.1016/j.envint.2023.107862>, 2023a.
- 585 Macintyre, H. L., Mitsakou, C., Vieno, M., Heal, M. R., Heaviside, C., and Exley, K. S.: Future impacts of O<sub>3</sub> on respiratory hospital admission in the UK from current emissions policies, *Environment International*, 178, 108 046, <https://doi.org/10.1016/j.envint.2023.108046>, 2023b.
- Marvin, M. R., Palmer, P. I., Yao, F., Latif, M. T., and Khan, M. F.: Uncertainties from biomass burning aerosols in air quality models obscure public health impacts in Southeast Asia, *Atmospheric Chemistry and Physics*, 24, 3699–3715, <https://doi.org/10.5194/acp-24-3699-2024>,  
 590 2024.
- Masoom, A., Kazadzis, S., Modini, R. L., Gysel-Beer, M., Gröbner, J., Coen, M. C., Navas-Guzman, F., Kouremeti, N., Brem, B. T., Nowak, N. K., Martucci, G., Hervo, M., and Erb, S.: Long range transport of Canadian Wildfire smoke to Europe in Fall 2023: aerosol properties and spectral features of smoke particles, *EGUsphere*, 2025, 1–43, <https://doi.org/10.5194/egusphere-2025-2755>, 2025.
- Mazzeo, A., Burrow, M., Quinn, A., Marais, E. A., Singh, A., Ng’ang’a, D., Gatari, M. J., and Pope, F. D.: Evaluation of the WRF and  
 595 CHIMERE models for the simulation of PM<sub>2.5</sub> in large East African urban conurbations, *Atmospheric Chemistry and Physics*, 22, 10 677–10 701, <https://doi.org/10.5194/acp-22-10677-2022>, 2022.
- Menut, L., Bessagnet, B., Khvorostyanov, D., Beekmann, M., Blond, N., Colette, A., Coll, I., Curci, G., Foret, G., Hodzic, A., Mailler, S., Meleux, F., Monge, J.-L., Pison, I., Siour, G., Turquety, S., Valari, M., Vautard, R., and Vivanco, M. G.: CHIMERE 2013: a model for regional atmospheric composition modelling, *Geoscientific Model Development*, 6, 981–1028, <https://doi.org/10.5194/gmd-6-981-2013>,  
 600 2013.
- Moura, L. C., Scariot, A. O., Schmidt, I. B., Beatty, R., and Russell-Smith, J.: The legacy of colonial fire management policies on traditional livelihoods and ecological sustainability in savannas: Impacts, consequences, new directions, *Journal of Environmental Management*, 232, 600–606, <https://doi.org/10.1016/j.jenvman.2018.11.057>, 2019.
- NAEI: Data, <https://naei.beis.gov.uk/data/>, accessed: 2021-10-07, 2021.
- 605 Nemitz, E., Vieno, M., Carnell, E., Fitch, A., Steadman, C., Cryle, P., Holland, M., Morton, R. D., Hall, J., Mills, G., Hayes, F., Dickie, I., Carruthers, D., Fowler, D., Reis, S., and Jones, L.: Potential and limitation of air pollution mitigation by vegetation and uncertainties of deposition-based evaluations, *Philosophical Transactions of the Royal Society A: Mathematical, Physical and Engineering Sciences*, 378, 20190 320, <https://doi.org/10.1098/rsta.2019.0320>, 2020.
- Ots, R., Young, D. E., Vieno, M., Xu, L., Dunmore, R. E., Allan, J. D., Coe, H., Williams, L. R., Herndon, S. C., Ng, N. L., Hamilton, J. F., Bergström, R., Di Marco, C., Nemitz, E., Mackenzie, I. A., Kuenen, J. J. P., Green, D. C., Reis, S., and Heal, M. R.: Simulating secondary organic aerosol from missing diesel-related intermediate-volatility organic compound emissions during the Clean Air for London (ClearLo) campaign, *Atmospheric Chemistry and Physics*, 16, 6453–6473, <https://doi.org/10.5194/acp-16-6453-2016>, 2016.
- Perry, M. C., Vanvyve, E., Betts, R. A., and Palin, E. J.: Past and future trends in fire weather for the UK, *Natural Hazards and Earth System Sciences*, 22, 559–575, <https://doi.org/10.5194/nhess-22-559-2022>, 2022.



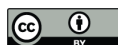

- 615 Purser, G., Heal, M. R., Carnell, E. J., Bathgate, S., Drewer, J., Morison, J. I. L., and Viena, M.: Simulating impacts on UK air quality from  
 net-zero forest planting scenarios, *Atmospheric Chemistry and Physics*, 23, 13 713–13 733, <https://doi.org/10.5194/acp-23-13713-2023>,  
 2023.
- Reis, S., Liška, T., Viena, M., Carnell, E. J., Beck, R., Clemens, T., Dragosits, U., Tomlinson, S. J., Leaver, D., and Heal, M. R.: The  
 influence of residential and workday population mobility on exposure to air pollution in the UK, *Environment International*, 121, 803–  
 620 813, <https://doi.org/10.1016/j.envint.2018.10.005>, 2018.
- Saha, S., Moorthi, S., Pan, H.-L., Wu, X., Wang, J., Nadiga, S., Tripp, P., Kistler, R., Woollen, J., Behringer, D., Liu, H., Stokes, D., Grumbine,  
 R., Gayno, G., Wang, J., Hou, Y.-T., ya Chuang, H., Juang, H.-M. H., Sela, J., Iredell, M., Treadon, R., Kleist, D., Delst, P. V., Keyser,  
 D., Derber, J., Ek, M., Meng, J., Wei, H., Yang, R., Lord, S., van den Dool, H., Kumar, A., Wang, W., Long, C., Chelliah, M., Xue,  
 Y., Huang, B., Schemm, J.-K., Ebisuzaki, W., Lin, R., Xie, P., Chen, M., Zhou, S., Higgins, W., Zou, C.-Z., Liu, Q., Chen, Y., Han, Y.,  
 625 Cucurull, L., Reynolds, R. W., Rutledge, G., and Goldberg, M.: The NCEP Climate Forecast System Reanalysis, *Bulletin of the American  
 Meteorological Society*, 91, 1015 – 1058, <https://doi.org/https://doi.org/10.1175/2010BAMS3001.1>, 2010.
- Seinfeld, J. H. and Pandis, S. N.: *Atmospheric Chemistry and Physics: From Air Pollution to Climate Change*, John Wiley & Sons, Hoboken,  
 New Jersey, third edn., ISBN 9781119221166, 2016.
- Seydi, S. T., Abatzoglou, J. T., Jones, M. W., Kolden, C. A., Filippelli, G., Hurteau, M. D., AghaKouchak, A., Luce, C. H., Miao,  
 630 C., and Sadegh, M.: Increasing global human exposure to wildland fires despite declining burned area, *Science*, 389, 826–829,  
<https://doi.org/10.1126/science.adu6408>, 2025.
- Simpson, D., Benedictow, A., Berge, H., Bergström, R., Emberson, L. D., Fagerli, H., Flechard, C. R., Hayman, G. D., Gauss, M., Jonson,  
 J. E., Jenkin, M. E., Nyíri, A., Richter, C., Semeena, V. S., Tsyro, S., Tuovinen, J.-P., Valdebenito, A., and Wind, P.: The EMEP MSC-W  
 chemical transport model - technical description, *Atmospheric Chemistry and Physics*, 12, 7825–7865, [https://doi.org/10.5194/acp-12-](https://doi.org/10.5194/acp-12-7825-2012)  
 635 7825-2012, 2012.
- Skamarock, W. C., Klemp, J. B., Dudhia, J., Gill, D. O., Liu, Z., Berner, J., Wang, W., Powers, J. G., Duda, M. G., Barker, D. M.,  
 and Huang, X.-Y.: A Description of the Advanced Research WRF Model Version 4, NCAR Tech. Note NCAR/TN-556+STR,  
<https://doi.org/10.5065/1dfh-6p97>, 2019.
- Stelson, A. and Seinfeld, J.: Relative humidity and temperature dependence of the ammonium nitrate dissociation constant, *Atmospheric  
 640 Environment* (1967), 16, 983–992, [https://doi.org/10.1016/0004-6981\(82\)90184-6](https://doi.org/10.1016/0004-6981(82)90184-6), 1982.
- Tan, D. Y. T., Heal, M. R., Viena, M., Stevenson, D. S., Reis, S., and Nemitz, E.: Changes in atmospheric oxidants teleconnect biomass  
 burning and ammonium nitrate formation, *npj Climate and Atmospheric Science*, 8, 277, <https://doi.org/10.1038/s41612-025-01150-5>,  
 2025.
- The International GEOS-Chem User Community: Geos-Chem, <https://geoschem.github.io/>, 2025.
- 645 Twigg, M. M., Di Marco, C. F., Leeson, S., van Dijk, N., Jones, M. R., Leith, I. D., Morrison, E., Coyle, M., Proost, R., Peeters, A. N. M.,  
 Lemon, E., Frelink, T., Braban, C. F., Nemitz, E., and Cape, J. N.: Water soluble aerosols and gases at a UK background site – Part 1:  
 Controls of PM<sub>2.5</sub> and PM<sub>10</sub> aerosol composition, *Atmospheric Chemistry and Physics*, 15, 8131–8145, [https://doi.org/10.5194/acp-15-](https://doi.org/10.5194/acp-15-8131-2015)  
 8131-2015, 2015.
- UCAR/NCAR/ACOM: Fire Inventory from NCAR version 2 Fire Emission, <https://rda.ucar.edu/datasets/ds312.9/>,  
 650 <https://doi.org/10.5065/XNPA-AF09>, accessed: 2023-05-03, 2023.
- UNEP: Spreading like Wildfire – The Rising Threat of Extraordinary Landscape Fires. A UNEP Rapid Response Assessment,  
[www.unep.org/resources/report/spreading-wildfire-rising-threat-extraordinary-landscape-fires](http://www.unep.org/resources/report/spreading-wildfire-rising-threat-extraordinary-landscape-fires), 2022.



- Vakkari, V., Kerminen, V.-M., Beukes, J. P., Tiitta, P., van Zyl, P. G., Josipovic, M., Venter, A. D., Jaars, K., Worsnop, D. R., Kulmala, M., and Laakso, L.: Rapid changes in biomass burning aerosols by atmospheric oxidation, *Geophysical Research Letters*, 41, 2644–2651, <https://doi.org/10.1002/2014GL059396>, 2014.
- Vaughan, G., Draude, A. P., Ricketts, H. M. A., Schultz, D. M., Adam, M., Sugier, J., and Wareing, D. P.: Transport of Canadian forest fire smoke over the UK as observed by lidar, *Atmospheric Chemistry and Physics*, 18, 11 375–11 388, <https://doi.org/10.5194/acp-18-11375-2018>, 2018.
- Vieno, M., Dore, A. J., Stevenson, D. S., Doherty, R., Heal, M. R., Reis, S., Hallsworth, S., Tarrason, L., Wind, P., Fowler, D., Simpson, D., and Sutton, M. A.: Modelling surface ozone during the 2003 heat-wave in the UK, *Atmospheric Chemistry and Physics*, 10, 7963–7978, <https://doi.org/10.5194/acp-10-7963-2010>, 2010.
- Vieno, M., Heal, M. R., Hallsworth, S., Famulari, D., Doherty, R. M., Dore, A. J., Tang, Y. S., Braban, C. F., Leaver, D., Sutton, M. A., and Reis, S.: The role of long-range transport and domestic emissions in determining atmospheric secondary inorganic particle concentrations across the UK, *Atmospheric Chemistry and Physics*, 14, 8435–8447, <https://doi.org/10.5194/acp-14-8435-2014>, 2014.
- Vieno, M., Heal, M. R., Twigg, M. M., MacKenzie, I. A., Braban, C. F., Lingard, J. J. N., Ritchie, S., Beck, R. C., Möring, A., Ots, R., Di Marco, C. F., Nemitz, E., Sutton, M. A., and Reis, S.: The UK particulate matter air pollution episode of March–April 2014: more than Saharan dust, *Environmental Research Letters*, 11, 044 004, <https://doi.org/10.1088/1748-9326/11/4/044004>, 2016a.
- Vieno, M., Heal, M. R., Williams, M. L., Carnell, E. J., Nemitz, E., Stedman, J. R., and Reis, S.: The sensitivities of emissions reductions for the mitigation of UK PM<sub>2.5</sub>, *Atmospheric Chemistry and Physics*, 16, 265–276, <https://doi.org/10.5194/acp-16-265-2016>, 2016b.
- Voulgarakis, A. and Field, R. D.: Fire Influences on Atmospheric Composition, Air Quality and Climate, *Current Pollution Reports*, 1, 70–81, <https://doi.org/10.1007/s40726-015-0007-z>, 2015.
- Whaley, C. H., Butler, T., Adame, J. A., Ambulkar, R., Arnold, S. R., Buchholz, R. R., Gaubert, B., Hamilton, D. S., Huang, M., Hung, H., Kaiser, J. W., Kaminski, J. W., Knote, C., Koren, G., Kouassi, J.-L., Lin, M., Liu, T., Ma, J., Manomaiphiboon, K., Bergas Masso, E., McCarty, J. L., Mertens, M., Parrington, M., Peiro, H., Saxena, P., Sonwani, S., Surapipith, V., Tan, D. Y. T., Tang, W., Tanpipat, V., Tsigaridis, K., Wiedinmyer, C., Wild, O., Xie, Y., and Zuidema, P.: HTAP3 Fires: towards a multi-model, multi-pollutant study of fire impacts, *Geoscientific Model Development*, 18, 3265–3309, <https://doi.org/10.5194/gmd-18-3265-2025>, 2025.
- Whaley, P., Nieuwenhuijsen, M., and Burns, J., eds.: Update of the WHO Global Air Quality Guidelines: Systematic Reviews, *Environment International*, <https://www.sciencedirect.com/special-issue/10MTC4W8FXJ>, special Issue, 2022.
- WHO: WHO global air quality guidelines: particulate matter (PM<sub>2.5</sub> and PM<sub>10</sub>), ozone, nitrogen dioxide, sulfur dioxide and carbon monoxide, World Health Organization, ISBN 9789240034228, 2021.
- Wiedinmyer, C., Akagi, S. K., Yokelson, R. J., Emmons, L. K., Al-Saadi, J. A., Orlando, J. J., and Soja, A. J.: The Fire INventory from NCAR (FINN): a high resolution global model to estimate the emissions from open burning, *Geoscientific Model Development*, 4, 625–641, <https://doi.org/10.5194/gmd-4-625-2011>, 2011.
- Wiedinmyer, C., Kimura, Y., McDonald-Buller, E. C., Emmons, L. K., Buchholz, R. R., Tang, W., Seto, K., Joseph, M. B., Barsanti, K. C., Carlton, A. G., and Yokelson, R.: The Fire Inventory from NCAR version 2.5: an updated global fire emissions model for climate and chemistry applications, *Geoscientific Model Development*, 16, 3873–3891, <https://doi.org/10.5194/gmd-16-3873-2023>, 2023.
- Witham, C. and Manning, A.: Impacts of Russian biomass burning on UK air quality, *Atmospheric Environment*, 41, 8075–8090, <https://doi.org/10.1016/j.atmosenv.2007.06.058>, 2007.



- Xie, Y., Lin, M., Decharme, B., Delire, C., Horowitz, L. W., Lawrence, D. M., Li, F., and Séférian, R.: Tripling of western US  
 690 particulate pollution from wildfires in a warming climate, *Proceedings of the National Academy of Sciences*, 119, e2111372119,  
<https://doi.org/10.1073/pnas.2111372119>, 2022.
- Xu, R., Ye, T., Huang, W., Yue, X., Morawska, L., Abramson, M. J., Chen, G., Yu, P., Liu, Y., Yang, Z., Zhang, Y., Wu, Y., Yu, W., Wen, B.,  
 Zhang, Y., Hales, S., Lavigne, E., Saldiva, P. H., Coelho, M. S., Matus, P., Roye, D., Klompaker, J., Mistry, M., Breitner, S., Zeka, A., Raz,  
 695 R., Tong, S., Johnston, F. H., Schwartz, J., Gasparrini, A., Guo, Y., and Li, S.: Global, regional, and national mortality burden attributable  
 to air pollution from landscape fires: a health impact assessment study, *The Lancet*, 404, 2447–2459, [https://doi.org/10.1016/S0140-6736\(24\)02251-7](https://doi.org/10.1016/S0140-6736(24)02251-7), 2024.
- Zhang, Q., Wang, Y., Xiao, Q., Geng, G., Davis, S. J., Liu, X., Yang, J., Liu, J., Huang, W., He, C., Luo, B., Martin, R. V., Brauer, M.,  
 Randerson, J. T., and He, K.: Long-range PM<sub>2.5</sub> pollution and health impacts from the 2023 Canadian wildfires, *Nature*, 645, 672–678,  
<https://doi.org/10.1038/s41586-025-09482-1>, 2025.
- 700 Zhang, Y., Beggs, P. J., McGushin, A., Bambrick, H., Trueck, S., Hanigan, I. C., Morgan, G. G., Berry, H. L., Linnenluecke, M. K., Johnston,  
 F. H., Capon, A. G., and Watts, N.: The 2020 special report of the MJA–Lancet Countdown on health and climate change: lessons learnt  
 from Australia’s “Black Summer”, *Medical Journal of Australia*, 213, 490–492.e10, <https://doi.org/10.5694/mja2.50869>, 2020.
